# Supplementary material
Source: MDPI journal article supplement (https://www.mdpi.com/2673-9259/3/1/6)

## **Supplementary Material**

Supplementary S1. Consolidated Criteria for Reporting Qualitative Studies (COREQ)

Supplementary S2. Interview guide

Supplementary S3. Codebook

Supplementary S4. Coding process

Supplementary S5. Figure S1 Conceptual model of study results

## Supplement S1. Consolidated Criteria for Reporting Qualitative Studies

### (COREQ) COREQ Reporting Standards: Checklist

1. *Which author/s conducted the interview or focus group?*

One author (E.F.) conducted all interviews.

2. *What were the researchers' credentials? e.g. PhD, MD*

The researchers' credentials are as follows: Erica Frechman, PhD; Bethany Rhoten, PhD, Harleah Buck, PhD, Amanda Davis, PhD, Mary S. Dietrich, PhD, Cathy A. Maxwell, PhD.

3. *What was their occupation at the time of the study?*

At the time of the study, one researcher was a PhD student and Nurse Practitioner. All other researchers were university faculty members.

4. *Was the researcher male or female?*

All researchers were female.

5. *What experience or training did the researcher have?*

Ms. Frechman received training in qualitative methodology from Vanderbilt University School of Nursing and ResearchTalk's Qualitative Research Summer Intensives. Dr. Dietrich is a biostatistician. All other researchers have previous experience conducting and analyzing qualitative research.

6. *Was a relationship established prior to study commencement?*

No relationships were established with any other interviewees.

7. *What did the participants know about the researcher? e.g. personal goals, reasons for doing the research*

The researcher's name, relationship with the study, and study background were included

in the interview invitation. At the start of each interview, greater detail regarding the study purpose was shared.

8. *What characteristics were reported about the interviewer/facilitator? e.g. bias, assumptions, reasons and interest in the research topic*

No characteristics were reported about the interviewers.

9. *What methodological orientation was stated to underpin the study? e.g. grounded theory, discourse analysis, ethnography, phenomenology, content analysis*

The interviewer presented each interview as based in content analysis.

10. *How were participants selected? e.g. purposive, convenience, consecutive, snowball*

Participants were identified using purposive sampling.

11. *How were participants approached? e.g. face-to-face, telephone, mail, e-mail*

Participants were invited to participate via telephone.

12. *How many participants were in the study?*

A total of 20 participants were in the study.

13. *How many people refused to participate or dropped out? Reasons?*

No participants refused to participate or dropped out.

14. *Where was the data collected? e.g. home, clinic, workplace*

Interviews were scheduled at a time convenient to the participant conducted on the telephone.

15. *Was anyone else present besides the participants and researcher?*

All interviews consisted of the researcher (E.F.) and the participant.

16. *What are the important characteristics of the sample? e.g. demographic data, date*

See Table 1 for pertinent sample demographic characteristics.

17. *Were questions, prompts, guides provided by the authors? Was it pilot tested?*

The interview guide is included. The guides were developed with authors input, and reviewed by all authors prior to the first interview. They were not formally pilot-tested.

18. *Were repeat interviews carried out? If yes, how many?*

No repeat interviews were carried out.

19. *Did the research use audio or visual recording to collect the data?*

With participant permission, all interviews were audio-recorded. The audio recordings were used for professional transcription of the interviews.

20. *Were field notes made during and/or after the interview or focus group?*

Brief field notes were taken during interviews as needed.

21. *What was the duration of the interviews or focus group?*

Interview length ranged from 12 to 28 minutes.

22. *Was data saturation discussed?*

Data saturation was discussed at the start of recruitment and throughout the interview process.

23. *Were transcripts returned to participants for comment and/or correction?*

Transcripts were not returned to participants for comment and/or correction.

24. *How many data coders coded the data?*

Two authors coded the data (E.F. and A.D.).

25. *Did authors provide a description of the coding tree?*

Yes, a description is provided through code book.

26. *Were themes identified in advance or derived from the data?*

Themes were derived from the data.

27. *What software, if applicable, was used to manage the data?*

The data was managed through Microsoft Office Excel.

28. *Did participations provide feedback on the findings?*

Yes, findings were shared with participants with member checking.

29. *Were participant quotations presented to illustrate the themes/findings? Was each quotation identified? e.g. participant number*

Participant quotations were presented to illustrate findings including participant number.

30. *Was there consistency between the data presented and the findings?*

Yes, based on study team interpretation and member check there is consistency between the data presented and the findings.

31. *Were major themes clearly presented in the findings?*

Major categories are clearly presented in the Results section of the manuscript.

32. *Is there a description of diverse cases or discussion of minor themes?*

Minor subcategories are discussed within the major categories of the findings.

**Planning for Aging and Frailty**  
**Qualitative Research: Semi-structured Interview Guide**

**This survey was about planning for aging that may lead to frailty. Can you tell me about your experience taking this survey?** (this question serves as an opener question to allow the participant to reflect on their experience)

**Probe:** How did you feel taking this survey?

**Probe:** What is your perception of the importance of such a topic?

**Prompt:** Have you thought about getting older? If so, tell me what you have thought about. Have you done anything about it?

**What has your past experience been like when you plan for a vacation or trip? For example, how did you go about this when you were still in the workforce?** (this question serves as a parallel question to get the participant thinking in the same line as questioning being asked. This may also serve to relay insight towards a participant's personality).

**Probe:** How important is it to plan vs. not plan for a vacation or trip?

**Prompt:** What is it about planning or lack of planning that either causes you to prepare or not prepare for a trip?

**What has been helpful to you in thinking about and planning for aging and frailty?** (this question builds on the previous question allowing the participant to identify positive aspects and facilitators involved in planning)

**Probe:** Any specific 'triggers' to consider planning?

**Prompt:** Following advice from a health professional, influence of friends or family, an incident that made you concerned about your health?

**Probe:** How do you plan or prepare?

**Prompt:** Could you give me an example of that...tell me about the last time you did that

**What has not been helpful to you (a barrier) in planning and thinking about aging and frailty?** (this question builds on the previous questions allowing the participant to identify negative aspects and barriers involved in planning)

**Probe:** Why have you not done planning?

**Prompt:** Do you see yourself getting older? Do you avoid unpleasant thoughts? Is it hard to consider yourself becoming frail? Do you feel overwhelmed with where to start?

## Planning for Aging and Frailty Qualitative Research Codebook

### Perceptions

| Categories        | Subcategories     | Code Descriptions and Data Samples                                                                                                                                                                                                                                       | IN VIVO CODES                                                                                                                                                                                                                                                                                                                                                                                                                                                                                                                                                                                                                                                                                                                                                                                                                                                                                                                                                                                                                                                                                                                                                                                                                           |
|-------------------|-------------------|--------------------------------------------------------------------------------------------------------------------------------------------------------------------------------------------------------------------------------------------------------------------------|-----------------------------------------------------------------------------------------------------------------------------------------------------------------------------------------------------------------------------------------------------------------------------------------------------------------------------------------------------------------------------------------------------------------------------------------------------------------------------------------------------------------------------------------------------------------------------------------------------------------------------------------------------------------------------------------------------------------------------------------------------------------------------------------------------------------------------------------------------------------------------------------------------------------------------------------------------------------------------------------------------------------------------------------------------------------------------------------------------------------------------------------------------------------------------------------------------------------------------------------|
| <b>This is me</b> | <i>Acceptance</i> | Codes refer to participants' acknowledgement of their situation in a matter-of-fact nature: "I'm not going to stay young," and "I'm trying to understand and accept."                                                                                                    | <p>"Begun thinking about getting older because apparently I'm not going to stay young. I thought that was the case. It isn't. I have to admit, as a very young baby boomer, I think we're a lot better off than previous generations at our age" (P1)</p> <p>"As we get older and admit that we're getting older" (P27)</p> <p>"I'm trying to understand and accept that I'm not going to be younger in these years" (P40)</p> <p>"Going to be losing some faculties and that's okay, it's part of life, right?" (P40)</p>                                                                                                                                                                                                                                                                                                                                                                                                                                                                                                                                                                                                                                                                                                              |
|                   | <i>Denial</i>     | Codes refer to participants' failure to acknowledge an unacceptable truth or admit something is happening: "doesn't feel real to me," "hard for me to reconcile that with the person I see in the mirror," and "you don't think that anything's going to happen to you." | <p>"Still in my own life, as I and my husband get older, it still doesn't feel real to me" (P5)</p> <p>"Still feels like something that happens to other people and not me" (P5)</p> <p>"It's actually happening right in front of me in my own home" (P5)</p> <p>"I find that there's a disconnect between the reality of what I know is going to happen because I've seen it happen to a lot of other people" (P5)</p> <p>"I expect I'm always going to be sort of this 23yo jerky person. It's hard for me to reconcile that with the person I see in the mirror" (P5)</p> <p>"Disconnect in terms of the reality of what happens as you age and that it's actually happening to you" (P5)</p> <p>"When you're younger, it seems like you're immortal, that this is not going to happen to you, and you don't understand, you don't plan properly, you don't believe that eventually your body is going to catch up with you, and you don't believe that you contract these horrible diseases, and surprise, surprise, it happens" (P16)</p> <p>"You don't think that anything's going to happen to you. You think, or this is what I thought in my mind, that if it does it's going to be in the 80s or 90s. You don't think of</p> |

|  |                                                   |                                                                                                                                                                                                |                                                                                                                                                                                                                                                                                                                                                                                                                                                                                                                                                                                                                                                                                                                                                                                                                                                                                                              |
|--|---------------------------------------------------|------------------------------------------------------------------------------------------------------------------------------------------------------------------------------------------------|--------------------------------------------------------------------------------------------------------------------------------------------------------------------------------------------------------------------------------------------------------------------------------------------------------------------------------------------------------------------------------------------------------------------------------------------------------------------------------------------------------------------------------------------------------------------------------------------------------------------------------------------------------------------------------------------------------------------------------------------------------------------------------------------------------------------------------------------------------------------------------------------------------------|
|  |                                                   |                                                                                                                                                                                                | something happening to you which could affect your aging ability and later" (P71)                                                                                                                                                                                                                                                                                                                                                                                                                                                                                                                                                                                                                                                                                                                                                                                                                            |
|  | <b><i>In the moment</i></b>                       | Codes refer to participants' recognition of their situation at the current time: "healthy right now," and "haven't reached that point in my life."                                             | <p>"I'm 64, not 84" (P25)</p> <p>"I am fully able to do as much as I've always been able to do" (P25)</p> <p>"I'm pretty healthy right now" (P93)</p> <p>"I don't really have any problems and I'm independent" (93)</p> <p>"I think it's something that people don't think about until they get there" (P5)</p> <p>"I haven't reached that point in my life" (P149)</p> <p>"I feel like I am just 50 years old. I don't think, I haven't seen that much about aging, but it is five or six years" (P40)</p> <p>"I'm starting to see some, some changes in my body and actually my mindset" (P40)</p> <p>"I'm going to be 73, and I look more like 50" (P150)</p> <p>"I'm in good health. I look good" (P150)</p> <p>"We try to enjoy every day and be thankful for everyday" (P33)</p> <p>"Frankly, I'm in pretty good health. So frailty isn't an issue for me" (P11)</p>                                  |
|  | <b><i>Facing your own aging and mortality</i></b> | Codes refer to participants' recognition of their aging process which may include topic of death and dying: "they die you're next in line," and "great possibility of not waking up tomorrow." | <p>"You have a buffer there with all your grandparents and your parents and everybody else, but as you get older and they die you're next in line" (P16)</p> <p>"It's not that I don't accept, acknowledge and reality the great possibility of not waking up tomorrow" (P16)</p> <p>"Until its real, you're not really...until you're looking at it right in the face, you're really...it's not a solid concept. It's not something that you can really grasp. And so it's easy to not plan for it. And then you find yourself without an income and you're like, 'Oh crap. Oh, this is what they're talking about" (P5)</p> <p>"My mother-in-law used to say and I know that this, a lot of people have said that...getting old is not for the sissys" (P5)</p> <p>"I'm thankful that even though health concerns creep in, that we are still alive and we have many, many friends that are not" (P33)</p> |
|  | <b><i>My Body</i></b>                             |                                                                                                                                                                                                |                                                                                                                                                                                                                                                                                                                                                                                                                                                                                                                                                                                                                                                                                                                                                                                                                                                                                                              |
|  | <b><i>Physical</i></b>                            | Codes refer to changes affecting participants' bodies: "don't have                                                                                                                             | <p>"I have more and more difficulty doing what I used to do" (P5)</p> <p>"I don't have the strength that I used to have" (P1)</p>                                                                                                                                                                                                                                                                                                                                                                                                                                                                                                                                                                                                                                                                                                                                                                            |

|                                   |                                      |                                                                                                                                                        |                                                                                                                                                                                                                                                                                                                                                                                                                                                                                                                                                                                                                                                                                                                                                                                                                                                                                                                                                                                                                               |
|-----------------------------------|--------------------------------------|--------------------------------------------------------------------------------------------------------------------------------------------------------|-------------------------------------------------------------------------------------------------------------------------------------------------------------------------------------------------------------------------------------------------------------------------------------------------------------------------------------------------------------------------------------------------------------------------------------------------------------------------------------------------------------------------------------------------------------------------------------------------------------------------------------------------------------------------------------------------------------------------------------------------------------------------------------------------------------------------------------------------------------------------------------------------------------------------------------------------------------------------------------------------------------------------------|
|                                   |                                      | <p>the strength” and “get tired a whole lot easier.”</p>                                                                                               | <p>"I get tired a whole lot easier. I've tried to make my life a little bit simpler to adapt to that" (P34)</p> <p>"I'm blessed with good health and basically the preventions that I deal with my diet, my exercise, and doing what's under my control" (P36)</p> <p>"I am looking to do more exercise for my brain about a year ago. I'm starting to learn my third language that is French, and I'm asking my daughter to help me understand, to read music. So that is because I am realizing that in my mind, I am getting a little bit older" (P40)</p> <p>"I realized I'm getting older when I tried to drag the lawnmower back up the hill, and it just about exhausted me" (P11)</p> <p>"Yes, I'm getting older, and I can feel it. There are things I can't do that I used to do. I'm still in very good shape for somebody who's going to be 70 next year. But there are things I can't do anymore" (P11)</p> <p>"My body and my mind as a single system" (P40)</p> <p>"The frailty issue is a big deal" (P11)</p> |
| <b>Self-Inventory/Life Review</b> | <b><i>Evaluation of life now</i></b> | <p>Codes refer to a reflective assessment of one's current life situation: "I'm a widow at my age, I have to think about what's going to happen."</p>  | <p>"Him and his wife would be able to help me in minor tasks, me and my husband, that we would need" (P25)</p> <p>"I'm a widow at my age, I have to think about, what's going to happen should I develop cancer or a heart condition, or something, and who will take care of me?" (P24)</p> <p>"I have a son that lives three hours away and a daughter that lives eight hours away. What will I do at that point in my life? So I have to start thinking about those things as I do get older" (P24)</p> <p>"I'm newly retired" (P131)</p> <p>"I'm not retired yet, and I probably won't retire until another year and a half" (P24)</p>                                                                                                                                                                                                                                                                                                                                                                                    |
|                                   | <b><i>Home</i></b>                   | <p>Codes refer to a reflective assessment of one's home environment: "make the home we're in a bit more accessible for us," and "get rid of rugs."</p> | <p>"Nothing tangible. We don't have any skin in the game anywhere other than our own home right now at this time." (P18)</p> <p>"We have done some things over the years to make the home we're in a bit more accessible for us" (P18)</p> <p>"Done a little preparation in my house and in my yard" (P93)</p> <p>"Get rid of rugs, make pathways from my bedroom to the bathroom" (P93)</p> <p>"Lights along the stairs" (93)</p>                                                                                                                                                                                                                                                                                                                                                                                                                                                                                                                                                                                            |

|  |                              |                                                                                                                                                                                                                     |                                                                                                                                                                                                                                                                                                                                                                                                                                                                                                                                                                                                                                                                                                                                                                                                                                                                                                                                                                                                                                                                                                                                                                                                                                                                                                                                                                                                                           |
|--|------------------------------|---------------------------------------------------------------------------------------------------------------------------------------------------------------------------------------------------------------------|---------------------------------------------------------------------------------------------------------------------------------------------------------------------------------------------------------------------------------------------------------------------------------------------------------------------------------------------------------------------------------------------------------------------------------------------------------------------------------------------------------------------------------------------------------------------------------------------------------------------------------------------------------------------------------------------------------------------------------------------------------------------------------------------------------------------------------------------------------------------------------------------------------------------------------------------------------------------------------------------------------------------------------------------------------------------------------------------------------------------------------------------------------------------------------------------------------------------------------------------------------------------------------------------------------------------------------------------------------------------------------------------------------------------------|
|  |                              |                                                                                                                                                                                                                     | <p>“Outside, I have a pretty big yard and I’ve tried to pare down” (93)</p> <p>“Pare down the amount of space I actually have now” (93)</p> <p>“Mowing is the biggest thing for me now” (93)</p> <p>"I own the house that I live in here, and it's a single story. And it's accessible" (P41)</p> <p>"House is easily accessible and it's now fairly well-equipped as far as taking care of needs" (P41)</p> <p>"Physically, the house and my living arrangements are fine" (P41)</p> <p>"We recently moved into a one level home that we hope to stay in" (P189)</p> <p>"My husband and I have already begun to think about our home, because we don't have a downstairs bedroom or a downstairs bathroom" (P33)</p> <p>“My husband and I already begun to realize, we're probably going to have to sell our house that we currently live in, because we've got about 30 years, and we'll be where they're at” (P33)</p> <p>"We started some simple things, like we've actually purchased a home....another home so that we can have a smaller home and one level living" (P21)</p> <p>"I have a friend who's getting his contractor's license so that he can build what you might call forever homes that are already set up to handle wheelchairs, and low sills on showers, ...to make it more possible for people to just get into a home and stay there rather than be forced to move to a care facility" (P11)</p> |
|  | <b><i>Support System</i></b> | <p>Codes refer to a reflective assessment of one's social situation and support network: “my son lives besides me,” and “can't really know at this point whether there will be a lot of social support for me.”</p> | <p>“Just having some support system to help you” (P25)</p> <p>“My son lives beside of me and we have an extremely good relationship” (P25)</p> <p>"Importance of having support groups, be it organizations, nonprofits, or just one another" (P27)</p> <p>"My daughter and her family want me to come down and either live with them or live near them" (P24)</p> <p>"You don't know the informal supports, you haven't established them over years” (P36)</p> <p>"I didn't have an established, although I did go forward and make some of these connections” (P36)</p>                                                                                                                                                                                                                                                                                                                                                                                                                                                                                                                                                                                                                                                                                                                                                                                                                                                 |

|  |                        |                                                                                                                                                                                       |                                                                                                                                                                                                                                                                                                                                                                                                                                                                                                                                                                                                                                                                                                                                                                                                                                                                                                                                                                                                                                                                                                                                                                                                                                                                                                                                                                                                                                     |
|--|------------------------|---------------------------------------------------------------------------------------------------------------------------------------------------------------------------------------|-------------------------------------------------------------------------------------------------------------------------------------------------------------------------------------------------------------------------------------------------------------------------------------------------------------------------------------------------------------------------------------------------------------------------------------------------------------------------------------------------------------------------------------------------------------------------------------------------------------------------------------------------------------------------------------------------------------------------------------------------------------------------------------------------------------------------------------------------------------------------------------------------------------------------------------------------------------------------------------------------------------------------------------------------------------------------------------------------------------------------------------------------------------------------------------------------------------------------------------------------------------------------------------------------------------------------------------------------------------------------------------------------------------------------------------|
|  |                        |                                                                                                                                                                                       | <p>"We don't have children that will necessarily be around to help us, so we realize that we are each other's support and that if something bad were to happen that we would have to hire outside help" (P189)</p> <p>"It was sort of an eyeopener to realize that I can't really know at this point whether there will be a lot of social support for me at the time when I need more" (P21)</p> <p>"But other things in terms of knowing what either...people look to family or church or whatever for social support, and I sort of felt like I'm not sure that we have a lot of that waiting in the wings for us if we get to the point where we need a lot of support in that area" (P21)</p> <p>" I have family members who have lots of children who live near them that hopefully they will have some support in their local community from family, but that's not something we really have" (P21)</p> <p>"Need to start socializing more" (P93)</p> <p>"Being out in the country so far away, I'm pretty isolated" (P16)</p> <p>"I have great group of friends, but it's still isolation that I am not used to, because I've always volunteered for this, that and the next thing, and I just do not have the strength to do it anymore" (P16)</p> <p>"You kind of like to think some family member will be around and maybe be able to pick up groceries for me, or a friend will, or I'll use Meals on Wheels" (P21)</p> |
|  | <b><i>Finances</i></b> | <p>Codes refer to a reflective assessment of one's financial situation: "have sufficient investments and retirement funds," and "don't have the money to get a lawyer right now."</p> | <p>"I have no debt. I have sufficient investments and retirement funds incoming that have, well beyond my lifetime" (P41)</p> <p>"I don't have the money to get a lawyer right now, because I have a lot of animals and I need to set up a pet trust fund for my animals. But legal aid doesn't do that, so I have to pay a lawyer, and I just don't have the money for it" (P16)</p> <p>"Financially I can't prepare for it right now" (P16)</p> <p>"Plans economically that I can put in place" (P36)</p> <p>"I think people need to think about it and have a plan, especially on the financial aspects of it, what are you going to do if you don't have family. I think it's important for people to think about" (P189)</p>                                                                                                                                                                                                                                                                                                                                                                                                                                                                                                                                                                                                                                                                                                   |

|                                 |                            |                                                                                                                                                                                                          |                                                                                                                                                                                                                                                                                                                                                                                                                                                                                                                                                                                                                                                                                                                                                                                                                                                                                                                                                                  |
|---------------------------------|----------------------------|----------------------------------------------------------------------------------------------------------------------------------------------------------------------------------------------------------|------------------------------------------------------------------------------------------------------------------------------------------------------------------------------------------------------------------------------------------------------------------------------------------------------------------------------------------------------------------------------------------------------------------------------------------------------------------------------------------------------------------------------------------------------------------------------------------------------------------------------------------------------------------------------------------------------------------------------------------------------------------------------------------------------------------------------------------------------------------------------------------------------------------------------------------------------------------|
|                                 |                            |                                                                                                                                                                                                          | <p>"We figured out the financial aspects of what we need and whether or not we have enough that's going to get us through" (P189)</p> <p>"What's really sad to me is the fact that I have enough money for one year" (P150)</p> <p>"I'm retired fairly well. Retired comfortably" (P41)</p>                                                                                                                                                                                                                                                                                                                                                                                                                                                                                                                                                                                                                                                                      |
| <b>Values/Beliefs/Attitudes</b> | <b><i>Independence</i></b> | Codes refer to one's own sense of individuality, motivations, and personal characteristics related to importance of being independent: "I'm extremely independent," and "don't have to rely on anyone."  | <p>"I'm extremely independent" (P25)</p> <p>"I don't have to rely on anyone for anything" (P93)</p> <p>"I would like to live independently as long as well. Until I die really" (P93)</p> <p>"I like to have my own space, I mean, as much as I want to live with them, it would be wonderful, I want my own freedom. I don't want to live in their house. Close by would be fine, but that's about it" (P24)</p> <p>"In addition to of course health issues my husband and I both currently have, and what that might mean for our future and what we would need to plan for, to stay as independent as we can for as long as we can" (P33)</p> <p>"When we can no longer be independent, how we can operate our lives and not be a burden on our children and the people that we love and care for" (P33)</p>                                                                                                                                                  |
|                                 | <b><i>Control</i></b>      | Codes refer to one's own sense of individuality, motivations, and personal characteristics related to importance of being in control: "what I want to do," and "I just try to stay as healthy as I can." | <p>"I want my wishes carried out. I want it in writing, what I want to do, who I want to be over making decision for me. If I get where I can't make those decisions for myself, I want them to know what I want to be done. If I choose to want to go into a home. Where I can't totally take care of me, or if I have talked with someone and we've talked and we'll decided that I'm to live with them, I want it to be my wishes. I want it to be something that I want to do and not what somebody else wants to do. And I don't want to be a burden on anyone." (P131)</p> <p>"Those are things that we were fortunate enough that we can do" (P21)</p> <p>"I just try to stay as healthy as I can" (P34)</p> <p>"Have everything in place where it won't be any confusion, no one can change anything for you" (P131)</p> <p>"We are planning to live a long, long time and we're trying to make decisions now that will help that be a reality" (33)</p> |

|  |                                                     |                                                                                                                                                                                                                                                                                    |                                                                                                                                                                                                                                                                                                                                                                                                                                                                                                                                                                                                                                                                                                                                                                                                                                                                                                                                                                                                                                                                                                                                                                                                                                                                                                                                                                                                                                                                                                                                                                                                                                                                                                                                                                                                                                                                                                                       |
|--|-----------------------------------------------------|------------------------------------------------------------------------------------------------------------------------------------------------------------------------------------------------------------------------------------------------------------------------------------|-----------------------------------------------------------------------------------------------------------------------------------------------------------------------------------------------------------------------------------------------------------------------------------------------------------------------------------------------------------------------------------------------------------------------------------------------------------------------------------------------------------------------------------------------------------------------------------------------------------------------------------------------------------------------------------------------------------------------------------------------------------------------------------------------------------------------------------------------------------------------------------------------------------------------------------------------------------------------------------------------------------------------------------------------------------------------------------------------------------------------------------------------------------------------------------------------------------------------------------------------------------------------------------------------------------------------------------------------------------------------------------------------------------------------------------------------------------------------------------------------------------------------------------------------------------------------------------------------------------------------------------------------------------------------------------------------------------------------------------------------------------------------------------------------------------------------------------------------------------------------------------------------------------------------|
|  | <b>Reflections</b>                                  |                                                                                                                                                                                                                                                                                    |                                                                                                                                                                                                                                                                                                                                                                                                                                                                                                                                                                                                                                                                                                                                                                                                                                                                                                                                                                                                                                                                                                                                                                                                                                                                                                                                                                                                                                                                                                                                                                                                                                                                                                                                                                                                                                                                                                                       |
|  | <b><i>Provoked feelings (exposure to study)</i></b> | Codes refer to one's own sense of individuality, motivations, and personal characteristics that have caused one to reflect and experience feelings unique to the participation in the study: "got me to reflect on my own situation," and "it made me realize that I didn't plan." | <p>"Enjoyed the experience taking the survey" (P27)</p> <p>"Felt very comfortable answering the questions" (P27)</p> <p>"What we have been discussing is most of us are in our seventies and eighties, what our lives would be like now had we the kind of information that I think this study is trying to figure it out" (P27)</p> <p>"Got me to reflect on my own situation and that of my husband" (P5)</p> <p>"Interested in survey primary because I am 77" (P41)</p> <p>"All of that is okay as far as I'm concerned, and I look to this to possibly point out areas that I need to cover more in detail" (P41)</p> <p>"I actually told my son where the important papers were the other day because of that. I said, "we have the medical power of attorney" and the different things that are end of life whatnot And I said, I want you to know where they are" (P149)</p> <p>"It made me realize that I didn't plan accordingly" (P71)</p> <p>"This survey made me realize, that people do not think they're going to age that quickly or even need any type of assistance when they get older. I just think it's a denial of some type" (P71)</p> <p>"Doing the survey actually forced me to start thinking a little bit more about things that I have kind of pushed aside and not thought about, possibly deliberately" (P21)</p> <p>"It was very interesting. It made me think" (P149)</p> <p>"But I just felt that, okay, you know what, I better let him know that there's paperwork that we did take care of. It wasn't something half thought out that you need to know where it's at. So it did make me think about it a little bit. I said the power of attorneys of medical, financial and everything is all in an envelope and where it is" (P149)</p> <p>"It's much harder, and I never really thought about it as much as I did after the survey, because some of it is just hard" (P21)</p> |
|  | <b><i>Self-thoughts</i></b>                         | Codes refer to one's own sense of individuality,                                                                                                                                                                                                                                   | <p>"I kind of worry about that" (P93)</p> <p>"We reached this stage, 65 and above, so rapidly" (P27)</p>                                                                                                                                                                                                                                                                                                                                                                                                                                                                                                                                                                                                                                                                                                                                                                                                                                                                                                                                                                                                                                                                                                                                                                                                                                                                                                                                                                                                                                                                                                                                                                                                                                                                                                                                                                                                              |

|  |                                |                                                                                                                                                                                                                        |                                                                                                                                                                                                                                                                                                                                                                                                                                                                                                                                                                                                                                                                                                                                                                                                                                                                                                                                                                                                                                                                |
|--|--------------------------------|------------------------------------------------------------------------------------------------------------------------------------------------------------------------------------------------------------------------|----------------------------------------------------------------------------------------------------------------------------------------------------------------------------------------------------------------------------------------------------------------------------------------------------------------------------------------------------------------------------------------------------------------------------------------------------------------------------------------------------------------------------------------------------------------------------------------------------------------------------------------------------------------------------------------------------------------------------------------------------------------------------------------------------------------------------------------------------------------------------------------------------------------------------------------------------------------------------------------------------------------------------------------------------------------|
|  |                                | <p>motivations, and personal characteristics that have caused one to reflect about their life: “I feel like I’m still a kid,” and “back then I was foot loose and fancy-free.”</p>                                     | <p>"Time flies" (P27)</p> <p>"In my earlier days back when I was 30, I never thought I'd live to see the turn of the century. And of course, here I am" (P41)</p> <p>"Back then I was foot loose and fancy free" (P41)</p> <p>"I feel like I'm still a kid. My kids are grown up and are adults of their own" (P149)</p> <p>"I'm 66, I still feel like a kid" (P149) "I'm also I guess I’m newly, getting to being in the category of the elderly" (P131)</p> <p>"One of the things that happens in aging, especially when you're young and teenagers and growing up in your 20s and 30s, you don't think that you're going to age that quickly" (P71)</p> <p>"I’ve always been a very positive person. I try not to let negativity get to me" (P24)</p>                                                                                                                                                                                                                                                                                                       |
|  | <b><i>Important</i></b>        | <p>Codes refer to one’s own sense of individuality, motivations, and personal characteristics related to importance of the topic of planning for aging and frailty: “hugely important topic” and “very important.”</p> | <p>“I guess so” (P25)</p> <p>“It is important topic” (P18)</p> <p>“Hugely important topic that is absolutely under considered in everything from the individuals we’re dealing with that are supposed to be helping with aging through, of course, their employees, what I call the medical industry at large” (P1)</p> <p>“Interesting” (P5)</p> <p>“Very important” (P34)</p> <p>“Very very important” (P16)</p> <p>"Very important" (P93)</p> <p>"It's important" (P149)</p> <p>"I think it’s very important that we have everything lined up so that there won’t be any confusion. There won’t be any misunderstanding. Everything will be in place." (P131)</p> <p>"It was informative" (P24)</p> <p>"Important to me" (P36)</p> <p>"It’s absolutely critical" (P36)</p> <p>"I think it's pretty important" (P189)</p> <p>"It's very important" (P40)</p> <p>"It's very, very, very important" (P150)</p> <p>"Right now, it's very important to me. I’m 57-year-old" (P33)</p> <p>"I think it is important" (P21)</p> <p>"It was an eye opener" (P21)</p> |
|  | <b><i>Stages of change</i></b> | <p>Codes refer to one’s own sense of individuality, motivations, and personal</p>                                                                                                                                      | <p>“Haven’t made plans” (P25)</p> <p>“Everybody’s at different stages in their lives” (P25)</p> <p>“Haven’t made specific plans on transitioning”</p>                                                                                                                                                                                                                                                                                                                                                                                                                                                                                                                                                                                                                                                                                                                                                                                                                                                                                                          |

|                    |             |                                                                                                                                                                                      |                                                                                                                                                                                                                                                                                                                                                                                                                                                                                                                                                                                                                                                                                                                                                                                                                                                                                                                                                                                                                                                                                                                                                                                                                                                                                                                                                                                                                                                |
|--------------------|-------------|--------------------------------------------------------------------------------------------------------------------------------------------------------------------------------------|------------------------------------------------------------------------------------------------------------------------------------------------------------------------------------------------------------------------------------------------------------------------------------------------------------------------------------------------------------------------------------------------------------------------------------------------------------------------------------------------------------------------------------------------------------------------------------------------------------------------------------------------------------------------------------------------------------------------------------------------------------------------------------------------------------------------------------------------------------------------------------------------------------------------------------------------------------------------------------------------------------------------------------------------------------------------------------------------------------------------------------------------------------------------------------------------------------------------------------------------------------------------------------------------------------------------------------------------------------------------------------------------------------------------------------------------|
|                    |             | <p>characteristics related to planning within the stages of the TTM: “haven’t made plans,” “thinking about next steps,” and “try to plan when that time comes.”</p>                  | <p>“Thinking about the next steps” (P25)</p> <p>“At the age I am and my wife too, we are thinking about the next steps that we’ll be” (P18)</p> <p>“Haven’t done anything about it” (P93)</p> <p>“Had me thinking” (P27)</p> <p>“It’s a topic that myself, told my siblings and several friends, we have actually talked about how to prepare for aging” (P27)</p> <p>"I'm adequately planned for that future as far as both physical and living arrangements and financials" (P41)</p> <p>"I have thought about it" (P16)</p> <p>"Try to plan when that time comes" (P34)</p> <p>"I've thought about the fact that I have to make my life simpler, try to make less work for me" (P34)</p> <p>"It made me think that I hadn't done any planning for my aging" (P149)</p> <p>"No, I try not to think about it" (P149)</p> <p>"Haven't really given it much thought" (P149)</p> <p>"Made me stop and think about what's going to happen to me in the future?" (P24)</p> <p>"I thought about getting older" (P36)</p> <p>"I have thought about it and we've made some plans for it" (P189)</p> <p>"We definitely have started already thinking about what steps we're going to have to take to maintain a health and independent lifestyle on our own" (P33)</p> <p>"Myself, my sister and a few other friends, we've been talking about this very topic here this past year" (P27)</p> <p>"My husband and I actively think about it" (P189)</p> |
| <b>Experiences</b> | <i>Self</i> | <p>Codes that refer the participants’ own experiences that have affected their perception on planning for aging and frailty: “lost my spouse,” and “I was also a social worker.”</p> | <p>"I've been a home health aid for years, so I've seen people get old and frail. I've seen what life is like when that happens" (P5)</p> <p>“Recently lost my spouse” (P41)</p> <p>"During the last year or two of her life, she went downhill rather fast" (P41)</p> <p>"I learned a whole lot of things because I was also a social worker....And my clients visually impaired or blind" (P131)</p> <p>"A little bit eye opening actually because I realize that my background is in nursing and also I was a geriatric nurse practitioner at one time until I retired, so I should have been really thinking a lot about what aging means and what kinds of changes to expect</p>                                                                                                                                                                                                                                                                                                                                                                                                                                                                                                                                                                                                                                                                                                                                                          |

|                        |                              |                                                                                                                                                                                                                                               |                                                                                                                                                                                                                                                                                                                                                                                                                                                                                                                                                                                                                                                                                                                                                                                                                                                                             |
|------------------------|------------------------------|-----------------------------------------------------------------------------------------------------------------------------------------------------------------------------------------------------------------------------------------------|-----------------------------------------------------------------------------------------------------------------------------------------------------------------------------------------------------------------------------------------------------------------------------------------------------------------------------------------------------------------------------------------------------------------------------------------------------------------------------------------------------------------------------------------------------------------------------------------------------------------------------------------------------------------------------------------------------------------------------------------------------------------------------------------------------------------------------------------------------------------------------|
|                        |                              |                                                                                                                                                                                                                                               | <p>and how to be more prepared for things that we would need as we got older" (P21)</p> <p>"The worst thing anybody could ever have happen is to lose a spouse" (P24)</p>                                                                                                                                                                                                                                                                                                                                                                                                                                                                                                                                                                                                                                                                                                   |
|                        | <b><i>Others</i></b>         | <p>Codes that refer the participants' experiences with others that have affected their perception on planning for aging and frailty: "my husband was diagnosed as bipolar," and "dealing with my mother-in-law and eventually my mother."</p> | <p>"My husband was diagnosed as bipolar when he was 40, and now he has Alzheimer's and so we did not plan. And so this has not been a good time" (P150)</p> <p>"Gone through too much drama in my life with family members or coworkers" (P24)</p> <p>"Known some older people in my life" (P93)</p> <p>"I went through dealing with my mother-in-law and eventually my mother, putting them in assisted living" (P149)</p> <p>"I think life and then working with people, the elderly, has given me a lot of insight into things and helped me plan my own journey a little bit" (P131)</p> <p>"My husband and I did not plan, because my parents died at age 62 and 65, and maybe had they lived I would have thought more about it" (P150)</p> <p>"My mother is 87, and my father is 93 and I see how they have taken exceptionally good care of their health" (P33)</p> |
|                        | <b><i>Caregiver Role</i></b> | <p>Codes that refer the participants' experiences in a caregiver role that have affected their perception on planning for aging and frailty: "take care of my mother-in-law," and "primary caregiver for my husband."</p>                     | <p>"Take care of my mother-in-law and grandchildren at the same time" (P25)</p> <p>"Ended up being a sole provider for her" (P41)</p> <p>"I was personally the caregiver for my mom. I oversaw everything for her and helped her along her journey" (P131)</p> <p>"The crisis as I have faced as a primary caregiver for my husband who is 78" (P36)</p> <p>"My wife is just coming off of two years of treatment for cancer. She just got to remission. She spent about 70 days between hospital skilled nursing and rehab last year. Then, even when she came home, she was mostly bedridden. She is still frail. I have been dealing with it from a caregiver perspective" (P11)</p> <p>"Because we ended up taking care of his parents, or his mother, particularly, so we saw what a burden it was" (P189)</p>                                                         |
| <b>Role in Society</b> | <b><i>Ageism</i></b>         | <p>Codes that refer to ageism issues affecting participants' role in society: "know it's</p>                                                                                                                                                  | <p>"I think people are really getting clobbered as they get sicker and older due in large part to the apathy or downright meanness of, again, the people that are supposed to be helping them" (P1)</p>                                                                                                                                                                                                                                                                                                                                                                                                                                                                                                                                                                                                                                                                     |

|  |                                        |                                                                                                                                                      |                                                                                                                                                                                                                                                                                                                                                                                                                                                                                                                                                                                                                                                                                                                                                                                                                                                                                                                                                                                                                                                                 |
|--|----------------------------------------|------------------------------------------------------------------------------------------------------------------------------------------------------|-----------------------------------------------------------------------------------------------------------------------------------------------------------------------------------------------------------------------------------------------------------------------------------------------------------------------------------------------------------------------------------------------------------------------------------------------------------------------------------------------------------------------------------------------------------------------------------------------------------------------------------------------------------------------------------------------------------------------------------------------------------------------------------------------------------------------------------------------------------------------------------------------------------------------------------------------------------------------------------------------------------------------------------------------------------------|
|  |                                        | because of my age.”                                                                                                                                  | <p>"Doctors need to be more patient" (P16)</p> <p>"I know it's because of my age I didn't get either job" (P16)</p> <p>"I just feel sorry for a lot of the elderly that are going to be facing this" (P150)</p>                                                                                                                                                                                                                                                                                                                                                                                                                                                                                                                                                                                                                                                                                                                                                                                                                                                 |
|  | <b><i>Purpose</i></b>                  | Codes that refer to participants' view of their meaning and role in society: "I still have so much to offer," and "need to use elderly people more." | <p>"More focus on the psychological aspects of elderly people, because it's not just our bodies, which everybody sees, but there's an inside to us that still remembers how we used to be. I mean we're not just old, frail, useless people" (P16)</p> <p>"I still have so much to offer and so much to give, and it's like I feel because I look and because I walk bent over now and I need a cane and all that, but my brain is still there... That hasn't gone away, but it's like... it just makes you feel like it's not worth anything" (P16)</p> <p>"Need to use elderly people more" (P16)</p> <p>"There's just so much good out there, and so much to live for" (P24)</p> <p>"If you've spent a whole life learning something and you're 70 plus, it would be very nice to share" (P36)</p>                                                                                                                                                                                                                                                           |
|  | <b><i>Generational differences</i></b> | Codes that refer to generational differences of participants: "living longer," and "this generation is planning better than our parents."            | <p>"We are younger than they were at the same age" (P1)</p> <p>"Living longer in most cases" (P1)</p> <p>"I'm not sure, having seen so much in the last several years, I'm thinking back that people are actually living better. I think some are at least for a while and that's fabulous" (P1)</p> <p>"Possibly this generation is planning better than our parents did" (P189)</p> <p>"I look at my parents and my in-laws and I don't think they really planned for it" (P189)</p> <p>"Just life has changed. The younger generation seems to be more into minimal things, whereas our parents were into... I don't want to say more materialistic, because that wasn't it. It was just that they valued things, like the wedding china and the sterling silver, and younger people don't. I think our generation is kind of stuck in the middle, like oh, my God, this meant a lot to my parents, it means nothing to my kids, what am I going to do with it?" (P189)</p> <p>"Nobody talked about it when I was growing up. Just didn't happen" (P150)</p> |
|  | <b><i>Preparedness in Aging</i></b>    | Codes that refer to society's state of                                                                                                               | "Aging population is obviously increasing all the time" (P18)                                                                                                                                                                                                                                                                                                                                                                                                                                                                                                                                                                                                                                                                                                                                                                                                                                                                                                                                                                                                   |

|                     |                                    |                                                                                                                                                                                              |                                                                                                                                                                                                                                                                                                                                                                                                                                                                                                                                                                                                                                                                                                                                                                                                                                                                                                                                                                                                                                                                             |
|---------------------|------------------------------------|----------------------------------------------------------------------------------------------------------------------------------------------------------------------------------------------|-----------------------------------------------------------------------------------------------------------------------------------------------------------------------------------------------------------------------------------------------------------------------------------------------------------------------------------------------------------------------------------------------------------------------------------------------------------------------------------------------------------------------------------------------------------------------------------------------------------------------------------------------------------------------------------------------------------------------------------------------------------------------------------------------------------------------------------------------------------------------------------------------------------------------------------------------------------------------------------------------------------------------------------------------------------------------------|
|                     |                                    | <p>readiness in planning for aging and frailty: “in this country, we don’t teach about aging to the young,” and “I just don’t know anyone that has talked to their children about this.”</p> | <p>"In this country, we don't teach about aging to the young, and I think that's where it should start" (P27)</p> <p>"There’s such a gap in knowledge, whether it’s within academia or the health industry or certainly within the senior population of the importance of planning, really planning and doing so on an informed basis" (P27)</p> <p>"Doors are harder to get open, and things are high on the shelf that are hard to get to...but it's just hard for an older person and there's never anybody around to help you" (P34)</p> <p>"I just feel sorry for a lot of the elderly that are going to be facing this" (P150)</p> <p>"I think word does have to get out there maybe even in the high schools. You know how high schools teach sex education now, and a lot of things that weren't there when I went to school? I think planning for aging should be taught some place in school" (P150)</p> <p>"I just don't know anyone that has talked to their children about this" (P150)</p> <p>"People are living longer, and so this is happening" (P150)</p> |
| <b>Future Needs</b> | <b><i>Anticipated Problems</i></b> | <p>Codes that refer to probable or expected issues that may arise in the future: “think about getting older and more dependent,” and “falling is a big problem.”</p>                         | <p>“So I’m sure that the older I get that I will have to have...I will lose some of that independence and I will have to rely on other people, even if it’s only to drive me around or to take me places” (P93)</p> <p>“Think about getting older and more dependent” (P25)</p> <p>“Falling is a big problem when you get older sometimes” (P93)</p> <p>“But I think as time passes on, I will not be able to use the basement anymore because the steps are really steep” (P93)</p> <p>"If I continued here, or went downhill in my own health, I would need of course assistance" (P41)</p> <p>"I don't know whether I will be able to be oriented in certain times, you don’t never know what’s going to happen to you" (P131)</p> <p>"In our case we had always hoped to live near our daughter, but we've come to realize as we've gotten older that's not realistic because she needs to live in a big city to do her work" (P21)</p>                                                                                                                                 |

|  |                                       |                                                                                                                                                                                                                                                                                               |                                                                                                                                                                                                                                                                                                                                                                                                                                                                                                                                                                                                                                                                                                                                                                                                                                                                                                                                                                                                                                                                                                                                 |
|--|---------------------------------------|-----------------------------------------------------------------------------------------------------------------------------------------------------------------------------------------------------------------------------------------------------------------------------------------------|---------------------------------------------------------------------------------------------------------------------------------------------------------------------------------------------------------------------------------------------------------------------------------------------------------------------------------------------------------------------------------------------------------------------------------------------------------------------------------------------------------------------------------------------------------------------------------------------------------------------------------------------------------------------------------------------------------------------------------------------------------------------------------------------------------------------------------------------------------------------------------------------------------------------------------------------------------------------------------------------------------------------------------------------------------------------------------------------------------------------------------|
|  |                                       |                                                                                                                                                                                                                                                                                               | <p>"Remove any obstacles that might in the future would affect the frailty" (P34)</p>                                                                                                                                                                                                                                                                                                                                                                                                                                                                                                                                                                                                                                                                                                                                                                                                                                                                                                                                                                                                                                           |
|  | <b><i>Planning in uncertainty</i></b> | <p>Codes that refer participants' level of skepticism related to planning: "you can't always prepare for everything."</p>                                                                                                                                                                     | <p>"I looked at what I had done to prepare and I also sort of came with a bit of a revelation that you can't always prepare for everything" (P21)</p> <p>"We've done some things in our household to be prepared, but it also kind of shocks me to think that there is so much that I cannot prepare for" (P21)</p> <p>"Planning to me is very important, but there's also sort of a realization or realizing that...that I've come to realize that you can't really know what's going to be there for you when the time comes" (P21)</p> <p>"I don't know what can be done about it" (P150)</p> <p>"I do think when it all boils down to it you can't be ever fully prepared because there are too many variables" (P21)</p> <p>"We've come to realize we need to be prepared to be on our own, but we're not entirely sure how to be fully prepared" (P21)</p>                                                                                                                                                                                                                                                                |
|  | <b><i>Proactive vs Reactive</i></b>   | <p>Codes refer the creating/controlling a situation by causing something to happen rather than responding to it after it has happened: "get maybe some solutions in line before we have to do a crisis reaction," and "encourage people as they get, even before they get to this stage."</p> | <p>"Even though my health is excellent right now, I have to think about what I am going to do and how do I want my kids to handle making decisions for me" (P24)</p> <p>"Excited that people are looking forward to kind of come up with solutions before we have the crisis" (P36)</p> <p>"Get maybe some solutions in line before we have to do a crisis reaction" (P36)</p> <p>"When you react out of a crisis mode, you're not going to have information. You're not going to know what's available" (P36)</p> <p>"When you're trying to do that in a crisis, you're kind of like needing to run out of a burning building with all the lights gone. It's not good, and it's dangerous" (P36)</p> <p>"You've got to have a what if plan. If you don't, you're at the mercy of whoever. And there's a lot of stinkers out there who will be more than happy to take advantage of" (P36)</p> <p>"Encourage people as they get, even before they get to this stage where they're considered the elderly, that they learn and start putting stuff in place and talking to their families and their friends about it" (P131)</p> |

|  |                                                 |                                                                                                                                                                                         |                                                                                                                                                                                                                                                                                                                                                                                                                                                                                                                                                                                                                                                                                                                                                                                 |
|--|-------------------------------------------------|-----------------------------------------------------------------------------------------------------------------------------------------------------------------------------------------|---------------------------------------------------------------------------------------------------------------------------------------------------------------------------------------------------------------------------------------------------------------------------------------------------------------------------------------------------------------------------------------------------------------------------------------------------------------------------------------------------------------------------------------------------------------------------------------------------------------------------------------------------------------------------------------------------------------------------------------------------------------------------------|
|  |                                                 |                                                                                                                                                                                         | "I read a lot on medical journal type articles and a lot of information on getting older and tips of good things you can do" (P33)                                                                                                                                                                                                                                                                                                                                                                                                                                                                                                                                                                                                                                              |
|  | <b><i>Formal planning &amp; end-of-life</i></b> | Codes that refer the formality of completing planning documents (i.e. advance directives) or associated end-of-life issues: "my wills and things are," and "my wife went into hospice." | <p>"My wills and things are, and my beneficiaries are, and executors of my wills and stuff are all informed and up to date" (P41)</p> <p>"One of the biggest things that I encourage people to do is to have a will in place, have a health plan in place" (P131)</p> <p>"My wife went into hospice about 3 weeks actually in under the hospice program. She stayed at home here and that was helpful. As I look back on the process, our process, I was probably more reluctant" (P41)</p> <p>"She was adamant about staying at home. She did not want to go to any kind of a facility" (P41)</p> <p>"I probably delayed, or we delayed actually taking the actual step of engaging with hospice" (P41)</p> <p>"I've got it set up right now, don't resuscitate me" (P131)</p> |

## Facilitators

| Categories      | Subcategories                 | Code Descriptions and Data Samples                                                                                                                                             | IN VIVO CODES                                                                                                                                                                                                                                                                                                                                                                                                                                                                                                                                                                                                                                                                                                                                                 |
|-----------------|-------------------------------|--------------------------------------------------------------------------------------------------------------------------------------------------------------------------------|---------------------------------------------------------------------------------------------------------------------------------------------------------------------------------------------------------------------------------------------------------------------------------------------------------------------------------------------------------------------------------------------------------------------------------------------------------------------------------------------------------------------------------------------------------------------------------------------------------------------------------------------------------------------------------------------------------------------------------------------------------------|
| <b>Identity</b> | <b><i>Youthful spirit</i></b> | Codes refer to participants' young mindset embodying characteristics of young people: "I forget what age I am," and "we enjoy doing a lot of physical labor around our house." | <p>"Well truthfully, I haven't really made plans for that" (P25)</p> <p>"I don't think so much about me getting older because I feel like everyone's is depending on me right now" (P25)</p> <p>"I am a very pragmatic person. I'm going to stay right here as long as I can" (P25)</p> <p>"I forget what age I am" (P25)</p> <p>"I felt like you needed the voice from somebody who wasn't planning their funeral" (P25)</p> <p>"I get very irritated at people being 60, whatever, and acting like their 90. It's ridiculous" (P25)</p> <p>"When I get to be 65...Oh I forget, I'm almost 65" (P25)</p> <p>"We're people right now that we enjoy doing a lot of physical labor around our house and in our yard and all that sort of stuff, but there's</p> |

|  |                                    |                                                                                                                                                                                                                                                                                                                                                                                                                                                                                                                                                                                                                                                                                                                                                                                                                                                                                                                                                                                                                                                                                                                                                                                                                                                                                                                                                                                                                                                                                                                                               |
|--|------------------------------------|-----------------------------------------------------------------------------------------------------------------------------------------------------------------------------------------------------------------------------------------------------------------------------------------------------------------------------------------------------------------------------------------------------------------------------------------------------------------------------------------------------------------------------------------------------------------------------------------------------------------------------------------------------------------------------------------------------------------------------------------------------------------------------------------------------------------------------------------------------------------------------------------------------------------------------------------------------------------------------------------------------------------------------------------------------------------------------------------------------------------------------------------------------------------------------------------------------------------------------------------------------------------------------------------------------------------------------------------------------------------------------------------------------------------------------------------------------------------------------------------------------------------------------------------------|
|  |                                    | <p>going to be a time that we don't want to do nearly what we do now" (P18)</p> <p>"I haven't had any health issues that I haven't been able to handle. I know my husband has a health issue" (P149)</p> <p>"I guess right now, since I'm in such good health, it's kind of hard to think about getting older and getting frail, and everything else. I told my kids before, should anything happen to me, I do not want them taking care of me at home. My husband was in a nursing home for just a little over a year, and it was an excellent experience." (P24)</p> <p>"I think I would go into an assisted living facility first where I still have my independence, but yet, somebody would come in just the check on me. I think I would prefer that. I'm a very independent person. I just don't want people having to take care of me. I guess that just would bother me a lot." (P24)</p> <p>"These people are still people, they're me in 20 years, they still have things they want to do and they don't get to do anything like that" (P71)</p>                                                                                                                                                                                                                                                                                                                                                                                                                                                                                  |
|  | <b><i>Listening to my body</i></b> | <p>Codes refer to the acknowledgement and recognition of physical changes within their bodies: "I can't do it. I'm going to have to get somebody else to help me do it," "a lot of health problems that keep occurring," and "I just don't have the stamina that I used to."</p> <p>"Very bitter pill for him to swallow" (P5)</p> <p>"Intellectually, he knows what he can't do anymore" (P5)</p> <p>"His ego is just having a really hard time paying somebody else to do it" (P5)</p> <p>"A hard step, I think, for people to acknowledge and accept and embrace. Okay, I can't do it. I'm going to have to get somebody else to help me do it. Okay. I'm going to participate in that process." (P5)</p> <p>"I'm a two-year cancer survivor right now. But the fallout from all the aggressive treatment has done a great deal of damage to me physically and emotionally and financially. There's just a lot of health problems that keep occurring. It's like a domino effect, and there's a lot of things the doctors just can't do because there's nothing there to work with anymore." (P16)</p> <p>"the damage is done. I mean it's done, so physically I just say I'm probably at about 20% of what I was pre-cancer" (P16)</p> <p>"When I trip, or if I have to get down on the floor for something it's a lot harder to get up, and mostly just getting tired, like if I'm in a shop and say, I mean, I could use to go all day but now I go to two or three places and I'm ready to go home and sit down. I just don't have</p> |

|                         |                              |                                                                                                                                                                                                                                                                                       |                                                                                                                                                                                                                                                                                                                                                                                                                                                                                                                                                                                                                                                                                                                                                                                                                                                                                                                                                                                                                                                                                                                                                                                                                                                                                                                                                                                                            |
|-------------------------|------------------------------|---------------------------------------------------------------------------------------------------------------------------------------------------------------------------------------------------------------------------------------------------------------------------------------|------------------------------------------------------------------------------------------------------------------------------------------------------------------------------------------------------------------------------------------------------------------------------------------------------------------------------------------------------------------------------------------------------------------------------------------------------------------------------------------------------------------------------------------------------------------------------------------------------------------------------------------------------------------------------------------------------------------------------------------------------------------------------------------------------------------------------------------------------------------------------------------------------------------------------------------------------------------------------------------------------------------------------------------------------------------------------------------------------------------------------------------------------------------------------------------------------------------------------------------------------------------------------------------------------------------------------------------------------------------------------------------------------------|
|                         |                              |                                                                                                                                                                                                                                                                                       | <p>the stamina that I used to and that reminds me” (P34)</p> <p>“I’m learning a third language and I invest at least 20 minutes per day at learning French. I speak Spanish as a first language English as a second language. And I’m looking at the language, because I need it’s because I know it brings, it’s going to be better with that exercise” (P40)</p> <p>"The head on collision wreck that put us on ventilators and not expected to live the night and I was never going to be able to walk again" (P71)</p>                                                                                                                                                                                                                                                                                                                                                                                                                                                                                                                                                                                                                                                                                                                                                                                                                                                                                 |
| <b>Life Experiences</b> | <b><i>Personal</i></b>       | Codes refer to participants’ self-experiences that have impacted their planning for aging and frailty: “my experience with other people being old and frail as a home health aide,” “worked as a social worker for the blind,” and “because of my exposure to aging through my work.” | <p>“I got UTIs because I had to wait for them, because I had to be in a bed for eight months, my whole body was crushed, so I couldn’t get up to go to the restroom. I had to wait for the CNA to life me up in a lift, put me back in bed....I held it in so long I had maybe two UTIs from holding it and I have never had a UTI in my life. So, that’s prepared me. It made me realize we needed to change our nursing facilities" (P71)</p> <p>“I take care of her, take her to the hairdresser, have pedicures, all her doctor’s appointments and things. I take care of her finances” (P25)</p> <p>"Took the lessons I learned, which helped me go through that journey with my mom" (P131)</p> <p>“My experience with other people being old and frail (as a home health aide) has given me some insight into what’s involved in getting caregivers, having help, when to recognize that you need help” (P5)</p> <p>"Plenty of experience coping with the Government" (P41)</p> <p>“I worked with, as a social worker for the blind, for the state, most of my clients were elderly” (P131)</p> <p>“I guess my background, knowing that it was important to have advance directives and have wills, that... Just because of my exposure to aging through my work, that I think was pretty obvious to me as something that we needed to do and have in place, so we did take care of that” (P21)</p> |
|                         | <b><i>Family/Friends</i></b> | Codes refer to participants’ experiences with their family or friends that have impacted their planning for aging and frailty: “my dad                                                                                                                                                | <p>“I think one of the triggers is the reality of losing friends as we age. So that makes me a step back and say, "Do I have my financial affairs in order, other legal things in order?" And also seeing the experience of friends who may have more serious health conditions go through their challenges has compelled me to</p>                                                                                                                                                                                                                                                                                                                                                                                                                                                                                                                                                                                                                                                                                                                                                                                                                                                                                                                                                                                                                                                                        |

|                           |  |                                                                                                                                                                                                                                                 |                                                                                                                                                                                                                                                                                                                                                                                                                                                                                                                                                                                                                                                                                                                                                                                                                                                                                                                                                                                                                                                                                                                                                                                                                                                                                                                                                                                                                                                                                                                                                                                                                                                                                                        |
|---------------------------|--|-------------------------------------------------------------------------------------------------------------------------------------------------------------------------------------------------------------------------------------------------|--------------------------------------------------------------------------------------------------------------------------------------------------------------------------------------------------------------------------------------------------------------------------------------------------------------------------------------------------------------------------------------------------------------------------------------------------------------------------------------------------------------------------------------------------------------------------------------------------------------------------------------------------------------------------------------------------------------------------------------------------------------------------------------------------------------------------------------------------------------------------------------------------------------------------------------------------------------------------------------------------------------------------------------------------------------------------------------------------------------------------------------------------------------------------------------------------------------------------------------------------------------------------------------------------------------------------------------------------------------------------------------------------------------------------------------------------------------------------------------------------------------------------------------------------------------------------------------------------------------------------------------------------------------------------------------------------------|
|                           |  | <p>had cancer and died of it too,” “as she aged and progressed...we had extensive experience in helping her,” and “seeing my aunt made me realize.”</p>                                                                                         | <p>be more mindful of different things that need to be in place, whether it's selection of doctors or being mindful of medications, things of that nature. Diet is important and there's been a change in my diet” (P27)</p> <p>“My dad had cancer and died of it too. We had some time when we had to be very helpful for my mom and just being there to be helpful and help him get around before he passed away. I saw that. Of course, we have other friends around our age, older and younger, and even younger than us, that are in much more dire conditions than we are. We see it around us at church, a lot of people” (P11)</p> <p>“And then as she aged and progressed, she actually went through all of those. So, we had the family, we had extensive experience in helping her and aiding her (mom)” (P41)</p> <p>"My aunt died of neglect in 2007 in a local nursing home, not because she didn't have good CNAs, but because they were so understaffed" (P71)</p> <p>"Seeing my aunt made me realize how much our seniors are ignored in their aging and also, my grandfather, whenever he went in his 80s with an iron blockage" (P71)</p> <p>"What I've realized the most how our seniors are ignored and some of them die because of that a lot earlier when they could have lived a better life" (P71)</p> <p>“My very best friend was my maid of honor when we got married, her husband came down with Alzheimer's, and watching her go through this I did have a chat with my husband and we said, 'you know what? If you ever get as bad as Paul, you're going to a home, and I'm not changing your diaper and you don't have to change mine. And it pretty mutual" (P150)</p> |
| <b>Financial Planning</b> |  | <p>Codes refer to the participants' comments on the role of financial resources and planning in life: “one of the most important things is financial security,” and “we do have some resources, financial resources that we can draw upon.”</p> | <p>“I think one of the most important things is financial security, which I have always planned for that. And so I feel very comfortable with that” (P25)</p> <p>“Financial resources” (P18)</p> <p>“We are fortunate that we do have some resources, financial resources that we can draw upon, and that’s a big thing for I think any stage of life” (P18)</p> <p>"I think like most people you have to prioritize. What is it that is your concern? Some people, their main concern would be financial. So they need to know where are the appropriate senior housing, subsidized housing. They need</p>                                                                                                                                                                                                                                                                                                                                                                                                                                                                                                                                                                                                                                                                                                                                                                                                                                                                                                                                                                                                                                                                                            |

|                                       |  |                                                                                                                                                                                                                                                                                                                                |                                                                                                                                                                                                                                                                                                                                                                                                                                                                                                                                                                                                                                                                                                                                                                                                                                                                                                                                                                                                                                                                                                                                                                                                                                                                                                                                                                                                                                                                                                                                                                                                                                                                                                                                                                                                                                                          |
|---------------------------------------|--|--------------------------------------------------------------------------------------------------------------------------------------------------------------------------------------------------------------------------------------------------------------------------------------------------------------------------------|----------------------------------------------------------------------------------------------------------------------------------------------------------------------------------------------------------------------------------------------------------------------------------------------------------------------------------------------------------------------------------------------------------------------------------------------------------------------------------------------------------------------------------------------------------------------------------------------------------------------------------------------------------------------------------------------------------------------------------------------------------------------------------------------------------------------------------------------------------------------------------------------------------------------------------------------------------------------------------------------------------------------------------------------------------------------------------------------------------------------------------------------------------------------------------------------------------------------------------------------------------------------------------------------------------------------------------------------------------------------------------------------------------------------------------------------------------------------------------------------------------------------------------------------------------------------------------------------------------------------------------------------------------------------------------------------------------------------------------------------------------------------------------------------------------------------------------------------------------|
|                                       |  |                                                                                                                                                                                                                                                                                                                                | to know what the informal supports that won't cost them.” (P36)                                                                                                                                                                                                                                                                                                                                                                                                                                                                                                                                                                                                                                                                                                                                                                                                                                                                                                                                                                                                                                                                                                                                                                                                                                                                                                                                                                                                                                                                                                                                                                                                                                                                                                                                                                                          |
| <b>Role Models</b>                    |  | Codes refer to participants' views of others' situation as an example to be imitated or as a learning experience for themselves: “they’ve maybe inspire us to think about those things too,” “seeing my family and friends and what they’re facing,” and “watch my parents and see the things that they have difficulty with.” | <p>“We do have our parents and some siblings that are somewhat older than us that have done this planning too, so they’ve maybe inspire us to think about those things too” (P18)</p> <p>“Just seeing my family and friends and what they're facing. I don't know if that's helpful in a good way, because now that I have that information, I'm still not sure how to make it better. But seeing what they've gone through and how they've been treated, it is discouraging.” (P1)</p> <p>“My parents did not get old, they did not live long enough to get old. So I didn't have... In my own personal family, I did not experience the aging, seeing someone go through planning for aging” (P5)</p> <p>“Life experiences. My brother and I were executors. My father passed in, let me see, 1972. And he was a planner. He had everything planned out for him and mom, and then my brother and I became co-executors of the trusts and stuff for mom.” (P41)</p> <p>“I haven't really thought about it. I remember my parents talking about trying to get special health insurance for aging and I'm like, it's just, I don't know. You don't necessarily plan for those things.” (P149)</p> <p>“I do watch my parents and see the things that they have difficulty with” (P33)</p> <p>“My husband has changed out many of the door knobs in our house for the lever type instead of the brown circle type, because I do have arthritis and I see what my mother can do with her arthritis. I know that I need door handles that we can open. Of course, I also see them walking up and down stairs and we know that we're going to have to probably change residents before we get closer to their age.” (P33)</p> <p>“Just observing how other people are handling things so that when I get to that point, how I'm going to handle it.” (P34)</p> |
| <b>Learning from others' mistakes</b> |  | Codes refer participants' ability to gain insight and acquire knowledge based on experiences with others: “they (inlaws) did not plan for a financial                                                                                                                                                                          | <p>“They (inlaws) did not plan for a financial security or anything else. So I am helping her well, not financially, but I helped. I have helped her a lot.” (P25)</p> <p>“I tried to arrange for her to move to an assisted living facility and did quite a bit of research and she refused to do that, so that’s that” (P25)</p>                                                                                                                                                                                                                                                                                                                                                                                                                                                                                                                                                                                                                                                                                                                                                                                                                                                                                                                                                                                                                                                                                                                                                                                                                                                                                                                                                                                                                                                                                                                       |

|                           |                             |                                                                                                                                                                                      |                                                                                                                                                                                                                                                                                                                                                                                                                                                                                                                                                                                                                                                                                                                                                                                                                                                                                                                                                                                                                                                                                                                                                                                                                                                                                                                                                                                                                                                                                                                                                                                                                                                                                                                                                                                                                               |
|---------------------------|-----------------------------|--------------------------------------------------------------------------------------------------------------------------------------------------------------------------------------|-------------------------------------------------------------------------------------------------------------------------------------------------------------------------------------------------------------------------------------------------------------------------------------------------------------------------------------------------------------------------------------------------------------------------------------------------------------------------------------------------------------------------------------------------------------------------------------------------------------------------------------------------------------------------------------------------------------------------------------------------------------------------------------------------------------------------------------------------------------------------------------------------------------------------------------------------------------------------------------------------------------------------------------------------------------------------------------------------------------------------------------------------------------------------------------------------------------------------------------------------------------------------------------------------------------------------------------------------------------------------------------------------------------------------------------------------------------------------------------------------------------------------------------------------------------------------------------------------------------------------------------------------------------------------------------------------------------------------------------------------------------------------------------------------------------------------------|
|                           |                             | <p>security,” “their children are saddled with the arrangements,” and “dealing with his parents and my parents,...we’ve seen the good things they’ve done and...the bad things.”</p> | <p>“I had several family members who had died in just the last few years now. I will say I'm sort of in the middle of my family, and none of us are young. So, and they didn't plan. And then that the family was, and especially their children are saddled with the arrangements and with the expense of the funeral and I really didn't want that. I didn't want my children have to worry about that. I wanted it all set up. So, that's just one less thing that you have to be concerned about.” (P93)</p> <p>“Sort of generally frightening when my mother became very ill, to see how we both were treated by everybody at the very end was an eye opener and absolutely horrifying” (P1)</p> <p>“And I also took care of my own mother when she got where she couldn't take care of, do certain things. So in learning, in traveling that journey, I saw what a lot of other people... I learned from other people's mistakes” (P131)</p> <p>“I think experience, you know, dealing with his parents and my parents, and we've seen the good things they've done and we've seen the bad things that they did, which kind of like okay, we are not going to put ourselves into that position, or we're not going to put our kids into that position” (P189)</p> <p>“His mother in her mid to late 80s developed Alzheimer's and she lived alone. She had a lot of trouble accepting the fact that she is growing older and was having problems” (P189)</p> <p>“She just couldn't accept the fact that her hair was white and that... You know, she didn't use a walker, but she could have been, she should have been. Just seeing her, I hope to be more cognizant of my aging and the fact that maybe that near miss I just had on the road is because I shouldn't be driving anymore, things like that” (P189)</p> |
| <b>Proactive Planning</b> | <b><i>Taking Action</i></b> | <p>Codes refer participants proactive behaviors in managing their lives: “tried to get rid of my debt,” “I use lists a lot,” and “simple things like pill containers.”</p>           | <p>“There are certain things that we do have in place as far as all of our legal documents and healthcare. Those are the major steps that we’ve taken so far” (P18)</p> <p>“I had tried to get rid of my debt” (P93)</p> <p>“We have trees, that tree that needed to be cut down. Normally my husband would just get the chainsaw out and cut them down. Because he can't do that anymore, I had to arrange for a tree guy to come and go through the whole process of picking somebody and arranging for them to come out. I met with a lot of resistance from my husband, but ultimately, I got somebody else to</p>                                                                                                                                                                                                                                                                                                                                                                                                                                                                                                                                                                                                                                                                                                                                                                                                                                                                                                                                                                                                                                                                                                                                                                                                        |

|                                  |                                                                                                                                                                                              |                                                                                                                                                                                                                                                                                                                                                                                                                                                                                                                                                                                                                                                                                                                                                                                                                                                                                                                                                                                                                                                                                                                                                                                                                                                                                                                                                                |
|----------------------------------|----------------------------------------------------------------------------------------------------------------------------------------------------------------------------------------------|----------------------------------------------------------------------------------------------------------------------------------------------------------------------------------------------------------------------------------------------------------------------------------------------------------------------------------------------------------------------------------------------------------------------------------------------------------------------------------------------------------------------------------------------------------------------------------------------------------------------------------------------------------------------------------------------------------------------------------------------------------------------------------------------------------------------------------------------------------------------------------------------------------------------------------------------------------------------------------------------------------------------------------------------------------------------------------------------------------------------------------------------------------------------------------------------------------------------------------------------------------------------------------------------------------------------------------------------------------------|
|                                  |                                                                                                                                                                                              | <p>do that for us, as I'm realizing that we're becoming the people that have to hire other people to do things for us that we used to do ourselves" (P5)</p> <p>"In the home environment to try to not have any kind of obstacles that I can trip over, and the exercise is important, and drinking a lot of water in the diet" (P34)</p> <p>"I use lists a lot and I don't do well with paper lists because I tend to lose them or lay them down somewhere then I can't find my list, but I always have my cell phone with me. I have incorporated using apps on the cell phone that have very simple lists." (P33)</p> <p>"I know that the doctors have talked with me about things that might make things easier for me going forward, simple things like pill containers. I don't rely on my memory to know whether I've taken my pills or not." (P33)</p>                                                                                                                                                                                                                                                                                                                                                                                                                                                                                                 |
| <i><b>Anticipating Needs</b></i> | <p>Codes refer to participants' awareness of care needs that may arise: "make a move to a house that requires less maintenance," and "given a lot of thought to preplanning my funeral."</p> | <p>"At the age we are things can happen mighty fast" (P18)</p> <p>"My wife and I are pretty much in agreement on what we'd like to do with our living situation as we go through the next years too. Well, we'd like to be in our present home probably for the next...maybe 6 to 8 years or so, and then make a move to a house that requires less maintenance" (P18)</p> <p>"I've really given a lot of thought to pre-planning my funeral" (P93)</p> <p>"Then to see the rapidity with which some of the people became ill, so ill, and then either dropped out because they were not being accommodated or passed." (P1)</p> <p>"I'm looking at home health care. I don't require it at this point, but I have been mindful and taking a look, not an extensive look, but looking at some of the local nursing healthcare facilities here, as well as the process when the need arise in order to secure home health aid assistance"</p> <p>sitting with the individual, and what are their needs, and what resources are appropriate" (P27)</p> <p>"I'm astounded to find out that only less than 10% of our veterans know about home aid and assistance" (P36)</p> <p>"But in order to make that a move I researched to where's the senior center, where are the places that would have the kinds of medical supports that would be important to his</p> |

|                              |               |                                                                                                                                                                         |                                                                                                                                                                                                                                                                                                                                                                                                                                                                                                                                                                                                                                                                                                                                                                                                                                                                                                                                                                                                                                                                                                                                                                                                                                                                                                                                                                                                                                                                                                                                                                                                                                                                                                                                                                                                               |
|------------------------------|---------------|-------------------------------------------------------------------------------------------------------------------------------------------------------------------------|---------------------------------------------------------------------------------------------------------------------------------------------------------------------------------------------------------------------------------------------------------------------------------------------------------------------------------------------------------------------------------------------------------------------------------------------------------------------------------------------------------------------------------------------------------------------------------------------------------------------------------------------------------------------------------------------------------------------------------------------------------------------------------------------------------------------------------------------------------------------------------------------------------------------------------------------------------------------------------------------------------------------------------------------------------------------------------------------------------------------------------------------------------------------------------------------------------------------------------------------------------------------------------------------------------------------------------------------------------------------------------------------------------------------------------------------------------------------------------------------------------------------------------------------------------------------------------------------------------------------------------------------------------------------------------------------------------------------------------------------------------------------------------------------------------------|
|                              |               |                                                                                                                                                                         | <p>particular needs. And so it was like, if you were a young couple and you were looking, of course, you're going to look for is good school, I have kids. And to a senior, you need to have a checklist, what are you looking for? It isn't just four walls, the ceiling and the floor. Where are the grocery stores? Where are the supports of a senior center or a church you're familiar with, your people, what ambiance is going to help you flourish?" (P36)</p> <p>"People need a checklist" (P36)</p>                                                                                                                                                                                                                                                                                                                                                                                                                                                                                                                                                                                                                                                                                                                                                                                                                                                                                                                                                                                                                                                                                                                                                                                                                                                                                                |
| <b>Educational Resources</b> | <i>Formal</i> | <p>Code refer to organized resources participants' have interacted with to obtain education: "class at the Senior Citizens center," "AARP," and "Medicare meeting."</p> | <p>"I took a part of that class at the Senior Citizens center...the class was supposed to teach you how to be more mobile and things you could do to decrease. And this was about fall prevention, you know, to decrease the likelihood of you falling" (P93)</p> <p>"I had joined the local senior center" (P1)</p> <p>"Center trying to accommodate people exactly between 54 and 99" (P1)</p> <p>"I guess one of the helpful things is, I'll phrase it as information. AARP, here in my town, the senior citizens' organizations and the local faith organizations and some of the city services have all been helpful and important resources for information" (P27)</p> <p>"I pay a lot of attention like to the AARP magazines and the newsletters that come out, and I have delivered prescriptions in the past" (P34)</p> <p>"I've had both of my knees replaced and the physical therapist that came out helped me with a lot of things, not just with my knee recovery, but talking to me about things as I get older and things to do to help me later on" (P34)</p> <p>"Going to this Medicare meeting" (P131)</p> <p>"We need more people educating, even realtors and SRES is a senior real estate expert" (P36)</p> <p>"The most helpful thing that we had was after my wife got out of the skilled nursing center, we had home health care come in. The physical therapist that came in from home health care taught my wife a number of things that have really helped her with her stability and how to keep from falling and how to make sure that you not losing your balance, and important things to keep from having accidents and being able to get around" (P11)</p> <p>"And as of recent, the person that has helped me the most would have been an elder care attorney" (P150)</p> |

|  |                 |                                                                                                                                                                             |                                                                                                                                                                                                                                                                                                                                                                                                                                                                                                                                                                                                                                                                                                                                                                                                                                                                                                                                                                                                                                                                                                                                                                                     |
|--|-----------------|-----------------------------------------------------------------------------------------------------------------------------------------------------------------------------|-------------------------------------------------------------------------------------------------------------------------------------------------------------------------------------------------------------------------------------------------------------------------------------------------------------------------------------------------------------------------------------------------------------------------------------------------------------------------------------------------------------------------------------------------------------------------------------------------------------------------------------------------------------------------------------------------------------------------------------------------------------------------------------------------------------------------------------------------------------------------------------------------------------------------------------------------------------------------------------------------------------------------------------------------------------------------------------------------------------------------------------------------------------------------------------|
|  |                 |                                                                                                                                                                             | <p>"The attorney told me, you have a choice: you can give what you have to the facility, or you can spend it on yourself and apply for Medicaid" (P150)</p> <p>"As I got older they (VA) would be offering each year retirement seminars where I worked, and in those seminars, they would explain to us not only about our financial benefits, but our insurances, and then also I think in one of the retirement seminars they talked about long-term care insurance" (P21)</p> <p>"I subscribe to the... Or belong to the AARP, so I get their newsletters and their... I started getting those in my 50s, so those sometimes have helpful advice. But I do think it's hard... I don't know that there is a place I go specifically to look up information about what to expect next. They offer some classes about planning, about options, about Medicare options, so those are helpful, and just their classes that you can attend and interact with other people who are also aging, the programs that they have provided over the internet during the pandemic, that's all been extremely helpful and I think that provides sort of a little social network too." (P21)</p> |
|  | <i>Informal</i> | Code refer to participants' relaxed and unofficial methods to obtain information and education: "talking with the elderly," and "a lot of my information is word of mouth." | <p>"I am always on the internet, so I've been trying to read up on pet trust funds. I have, again, plans, but financially just can't follow through with those plans right now" (P16)</p> <p>"Talking with the elderly, some of my elderly friends, they also gave me advice about certain things I need to have done" (P131)</p> <p>"An example would be my Medicare plan. I talked with people and they gave me a lot of insights into the different plans. I knew nothing about that. I didn't know that it's a plan A and B"</p> <p>"I read up on it, I go online" (P131)</p> <p>"A lot of my information is word of mouth, talking from other people and learning from their experience" (P131)</p>                                                                                                                                                                                                                                                                                                                                                                                                                                                                            |

## Barriers

| Categories | Subcategories | Code Descriptions and Data Samples | IN VIVO CODES                                                                            |
|------------|---------------|------------------------------------|------------------------------------------------------------------------------------------|
| Mindset    | <i>Denial</i> | Codes refer participants'          | "As far as I know I'm getting older. I feel myself being able to do less and less, but I |

|  |                               |                                                                                                                                                                                                                |                                                                                                                                                                                                                                                                                                                                                                                                                                                                                                                                                                                                                                                                                                                                                                                                                                                                                                                                                                                                                                                                                                                                                                                                                                                                                                               |
|--|-------------------------------|----------------------------------------------------------------------------------------------------------------------------------------------------------------------------------------------------------------|---------------------------------------------------------------------------------------------------------------------------------------------------------------------------------------------------------------------------------------------------------------------------------------------------------------------------------------------------------------------------------------------------------------------------------------------------------------------------------------------------------------------------------------------------------------------------------------------------------------------------------------------------------------------------------------------------------------------------------------------------------------------------------------------------------------------------------------------------------------------------------------------------------------------------------------------------------------------------------------------------------------------------------------------------------------------------------------------------------------------------------------------------------------------------------------------------------------------------------------------------------------------------------------------------------------|
|  |                               | <p>declaring something to be untrue: "I don't believe it's real," "my unwillingness to admit," and "I don't feel like I'm aging."</p>                                                                          | <p>don't believe it's real yet. I'm not quite sure what hasn't been helpful. I think it's in my head. And so I'm kind of mirroring a little bit what I was just complaining about my husband doing. It's me not fully being able to say, "Oh, you know, I can't do that." Or, "Soon I'm not going to be able to do that. I'm not... Surely that's not really the case. Surely I will always continue to be able to do everything that I can and want to do now. Surely there's not going to become a time when I can't drive." So I don't plan for that because I just kind of don't believe that that would actually be my reality" (P5)</p> <p>"My unwillingness to admit that I'm getting older" (P189)</p> <p>"I don't feel like I'm aging, but I can tell a little bit mentally, my short-term memory is not as good, but it's because I had so much on my mind" (P71)</p>                                                                                                                                                                                                                                                                                                                                                                                                                               |
|  | <b><i>Procrastination</i></b> | <p>Code refer to participants' acknowledgement that they have delayed or postponed action: "I guess haven't gotten it," "I still haven't done anything about that," and "I really need to look into that."</p> | <p>"Well, I will say, I am, I guess I have been some stuff that I have just, even though I know it needs to be done, I guess haven't gotten it. Now and there things like, and again, I'd like to pre-plan my funeral and I do have a will. And I know you're supposed to put in your will what you want. It's too late then. And I have made my wishes known to my children about what I do. But I personally have not. I plan on doing it, you know" (P93)</p> <p>"I thought about doing it, but I still haven't done anything about that. And I put the driving and I'm not so sure... I can only drive in the daylight now, so I really need to start thinking about just... And I don't mean like I'm going to stop driving next year. You know, I really need to start thinking about how I would get around because I don't live in town. So I have to have some type of way to get to the store, to the doctors, whatever, and I really need to look into that" (P93)</p> <p>"Well, in a way unpleasant because I know that these things are, in all probability, will happen and I really should be planning and not waiting until the last minute." (P93)</p> <p>"Some things may be financial. There's things like putting the house and trust so that the kids get it if something happens to</p> |

|  |                                         |                                                                                                                                                                                                                                        |                                                                                                                                                                                                                                                                                                                                                                                                                                                                                                                                                                                                                                                                                                                                                                                                                                                                                                                                                                                                                                                                                                                                                                                                                                                                                                                                                                                                                                                                                                            |
|--|-----------------------------------------|----------------------------------------------------------------------------------------------------------------------------------------------------------------------------------------------------------------------------------------|------------------------------------------------------------------------------------------------------------------------------------------------------------------------------------------------------------------------------------------------------------------------------------------------------------------------------------------------------------------------------------------------------------------------------------------------------------------------------------------------------------------------------------------------------------------------------------------------------------------------------------------------------------------------------------------------------------------------------------------------------------------------------------------------------------------------------------------------------------------------------------------------------------------------------------------------------------------------------------------------------------------------------------------------------------------------------------------------------------------------------------------------------------------------------------------------------------------------------------------------------------------------------------------------------------------------------------------------------------------------------------------------------------------------------------------------------------------------------------------------------------|
|  |                                         |                                                                                                                                                                                                                                        | my husband and I, that kind of thing, and just haven't gotten around to it.” (P34)                                                                                                                                                                                                                                                                                                                                                                                                                                                                                                                                                                                                                                                                                                                                                                                                                                                                                                                                                                                                                                                                                                                                                                                                                                                                                                                                                                                                                         |
|  | <b><i>Fear &amp; Negativity</i></b>     | Codes refer the unpleasant emotion and negative association with aging: “It’s not pleasant at all,” and “fear is the biggest negative when it comes to health issues.”                                                                 | <p>“I could imagine that folks who may not feel confident about life in general, I would imagine there could be some very significant barriers” (P18)</p> <p>“ It's just I feel like if I do a lot of this stuff, it's almost looking at a certainty kind of thing” (P93)</p> <p>"I'm sorry to be such a Debbie Downer" (P1)</p> <p>“I definitely see it and I feel it, and it's not pleasant at all. I was always an extremely active, strong... I was always the go to person when anybody ever needed anything, and I just can't do it anymore. I guess you could say that leads into the psychological part of a lot of my self-worth has just gone to hell.” (P27)</p> <p>“Fear. If I stew about in my mind, stew about what's going to happen with the health concerns that we currently have that are not going to go away, but it is what it is. To sit and worry and worry and worry has absolutely nothing but a negative effect on all of our lives and the fear of what's going to come next. Fear is for me personally, the biggest negative when it comes to health issues.” (P33)</p> <p>“Fear to me, is the biggest negative life situation for concerning the future that I can think of” (P33)</p> <p>“I know it's going to happen. Do I see myself like my husband? No. I've told my kids, I said, "If I get like that, just shoot me. I'm done. I'll move out to Oregon or California, the two states that have assisted dying. I'm done. You don't have to put up with me” (P150)</p> |
|  | <b><i>Optimism &amp; Positivity</i></b> | Codes refer to participants’ sense of hopefulness and confidence about their life and the future that leads to a level of being content: “I enjoy my life, I’m happy, I have a good life,” “I just still think I’m young and vibrant,” | <p>“For me, I can honestly say there haven't been any barriers, because I've always been, my wife too, a planner and researcher, and we kind of enjoy doing those sorts of things.” (P18)</p> <p>“I wouldn't say it's unpleasant because I enjoy my life, I'm happy, I have a good life, a nice home. I wouldn't call it unpleasant. I would just say from a psychological point of view, it's a matter of readjusting that's difficult and it begins with self-awareness and acknowledgement of the changes” (P27)</p>                                                                                                                                                                                                                                                                                                                                                                                                                                                                                                                                                                                                                                                                                                                                                                                                                                                                                                                                                                                    |

|  |  |                                            |                                                                                                                                                                                                                                                                                                                                                                                                                                                                                                                                                                                                                                                                                                                                                                                                                                                                                                                                                                                                                                                                                                                                                                                                                                                                                                                                                                                                                                                                                                                                                                                                                                                                                                                                                                                                                                                                                                                                                                                                                                                                                 |
|--|--|--------------------------------------------|---------------------------------------------------------------------------------------------------------------------------------------------------------------------------------------------------------------------------------------------------------------------------------------------------------------------------------------------------------------------------------------------------------------------------------------------------------------------------------------------------------------------------------------------------------------------------------------------------------------------------------------------------------------------------------------------------------------------------------------------------------------------------------------------------------------------------------------------------------------------------------------------------------------------------------------------------------------------------------------------------------------------------------------------------------------------------------------------------------------------------------------------------------------------------------------------------------------------------------------------------------------------------------------------------------------------------------------------------------------------------------------------------------------------------------------------------------------------------------------------------------------------------------------------------------------------------------------------------------------------------------------------------------------------------------------------------------------------------------------------------------------------------------------------------------------------------------------------------------------------------------------------------------------------------------------------------------------------------------------------------------------------------------------------------------------------------------|
|  |  | <p>and “I’m still able to enjoy life.”</p> | <p>"I just still think I'm young and vibrant" (P149)</p> <p>“It's just, we're living longer or at least we like to think we are. Not invincible but healthier or at least I am” (P149)</p> <p>“I look in the mirror every day. I know I'm not that hot mama, but I'm still pretty. I'm still able to get up and this is me. This is what I tell myself. I thank God every day that I get and I'm still in my right mind, that I'm able to, just like I've gotten up this morning, I've already did my three miles and I was cooking. I'm still able to take care of myself.” (P24)</p> <p>“So I'm still able to enjoy life and I don't have to depend on anyone, but I hope and pray that I don't have to depend on anyone. I hope I be like, I'm going to see my aunt that will be 89” (P131)</p> <p>“I just hope and pray that one day I just go to sleep and I just wake up on the other side. But I wake up I'm in that glorious place, but I don't have to worry about anything or I didn't suffer or anything like that” (P131)</p> <p>“To me, age is a number. I think you can make yourself be an old 65, or you can make yourself be, in your mind, a 20-years-old 65. So I think it's all in how you perceive yourself. I don't feel, I mean, I don't think of myself as being a 65-year-old woman. I don't know. My mind still goes back to the days when I was in my 30s, and my mind still feels that way” (P24)</p> <p>"I see myself in the mirror getting wrinkles, but miraculously, I have no pain" (P71)</p> <p>"I still feel like I'm 16, mentally" (P71)</p> <p>“My father is 93 and my mother is 87 and I absolutely plan to live as long as they do. I think that it takes a little planning” (P33)</p> <p>“I know that I have to stay healthy and try to continue to exercise and stay engaged. When sometimes you don't want to be engaged, I try to spend daily time with my little 10-month old grandson and I'll be engaged in football. My husband and I stay active even if our joints hurt, even if we don't feel great, we are up and we are</p> |
|--|--|--------------------------------------------|---------------------------------------------------------------------------------------------------------------------------------------------------------------------------------------------------------------------------------------------------------------------------------------------------------------------------------------------------------------------------------------------------------------------------------------------------------------------------------------------------------------------------------------------------------------------------------------------------------------------------------------------------------------------------------------------------------------------------------------------------------------------------------------------------------------------------------------------------------------------------------------------------------------------------------------------------------------------------------------------------------------------------------------------------------------------------------------------------------------------------------------------------------------------------------------------------------------------------------------------------------------------------------------------------------------------------------------------------------------------------------------------------------------------------------------------------------------------------------------------------------------------------------------------------------------------------------------------------------------------------------------------------------------------------------------------------------------------------------------------------------------------------------------------------------------------------------------------------------------------------------------------------------------------------------------------------------------------------------------------------------------------------------------------------------------------------------|

|                      |                                    |                                                                                                                                                                                                                                                                                      |                                                                                                                                                                                                                                                                                                                                                                                                                                                                                                                                                                                                                                                                                                                                                                                                                                                                                                                                                                                                                                                                                                                                                                   |
|----------------------|------------------------------------|--------------------------------------------------------------------------------------------------------------------------------------------------------------------------------------------------------------------------------------------------------------------------------------|-------------------------------------------------------------------------------------------------------------------------------------------------------------------------------------------------------------------------------------------------------------------------------------------------------------------------------------------------------------------------------------------------------------------------------------------------------------------------------------------------------------------------------------------------------------------------------------------------------------------------------------------------------------------------------------------------------------------------------------------------------------------------------------------------------------------------------------------------------------------------------------------------------------------------------------------------------------------------------------------------------------------------------------------------------------------------------------------------------------------------------------------------------------------|
|                      |                                    |                                                                                                                                                                                                                                                                                      | <p>out and we are engaged in fun activities.” (P33)</p> <p>“We still try to do activities around the yard and around the house. We are young at heart and we try to force our body to do things within safe standards, obviously. To stay active and healthy and yes, we absolutely do. We fight against the fear of creeping in and we just believe that we're going to have a long and happy life and we try to enjoy every day and be thankful for every day. I'm thankful that even though health concerns creep in, that we are still alive and we have many, many friends that are not and so, yes, we are planning to live a long, long time and we're trying to make decisions now that will help that be a reality.” (P33)</p>                                                                                                                                                                                                                                                                                                                                                                                                                           |
|                      | <i><b>Taking it in stride</b></i>  | <p>Codes refer to participants' way of dealing with planning for aging and frailty in a calm, accepting, and matter-of-fact way: “I'm either going to get older or I'm going to die,” “It's kind of is what it is,” and “I'm realistic about it but I'm not depressed about it.”</p> | <p>“I'm either going to get older or I'm going to die. I assume I will get older” (P25)</p> <p>“I think I keep it in perspective. I'm going to get old and I'm going to die, but I don't think it's necessary to sit around and think about, oh my God, I'm getting old. Oh my God, I'm going to die. Yes, that's going to happen. But like I say, I don't know what plans I can make right now, to go to an assisted living facility when I'm as healthy as I was 10 years ago. (P25)</p> <p>“It's seasons of life. It's just... It's kind of is what it is” (P18)</p> <p>“I'm realistic about it but I'm not depressed about it. I know it's coming. I watched my parents become frail and I know it's coming. But I'm not happy about it but I'm not depressed or anything like that. I'm accepting of it. (P34)</p> <p>"My thing is if and when I have to go to the nursing home. Geeze, I hope they play a little better music like rock and roll" (P149)</p> <p>“I think growing up it was something nobody ever talked about. I didn't know anybody that had a long-term care plan. I don't know. I guess we were just really naive back then.” (P150)</p> |
| <b>An Aging Body</b> | <i><b>Physical Limitations</b></i> | <p>Codes refer to participants' recognition of their aging body and limits in their physical</p>                                                                                                                                                                                     | <p>“There are some things that you do have to make some adjustments to, that's for sure, as far as maybe you don't have quite the stamina that we had in the past and don't have quite the physical strength in the</p>                                                                                                                                                                                                                                                                                                                                                                                                                                                                                                                                                                                                                                                                                                                                                                                                                                                                                                                                           |

|  |  |                                                                                                                                                                                                  |                                                                                                                                                                                                                                                                                                                                                                                                                                                                                                                                                                                                                                                                                                                                                                                                                                                                                                                                                                                                                                                                                                                                                                                                                                                                                                                                                                                                                                                                                                                                                                                                                                                                                                                                                                                                                                                                                                                                                                                                                                                                                                                                                                                       |
|--|--|--------------------------------------------------------------------------------------------------------------------------------------------------------------------------------------------------|---------------------------------------------------------------------------------------------------------------------------------------------------------------------------------------------------------------------------------------------------------------------------------------------------------------------------------------------------------------------------------------------------------------------------------------------------------------------------------------------------------------------------------------------------------------------------------------------------------------------------------------------------------------------------------------------------------------------------------------------------------------------------------------------------------------------------------------------------------------------------------------------------------------------------------------------------------------------------------------------------------------------------------------------------------------------------------------------------------------------------------------------------------------------------------------------------------------------------------------------------------------------------------------------------------------------------------------------------------------------------------------------------------------------------------------------------------------------------------------------------------------------------------------------------------------------------------------------------------------------------------------------------------------------------------------------------------------------------------------------------------------------------------------------------------------------------------------------------------------------------------------------------------------------------------------------------------------------------------------------------------------------------------------------------------------------------------------------------------------------------------------------------------------------------------------|
|  |  | <p>activity: “don’t have quite the stamina that we had in the past,” “kneeled down in the garden and then I have a heck of a time getting back up,” and “don’t have the strength I used to.”</p> | <p>past. As far as our intellectual pursuits and things like that, those things haven't seemed to abated very much” (P18)</p> <p>“On a more personal level, yeah. It is very difficult. Just as an example. I enjoy gardening and as I have aged, just the bending, the stretching, the physical limitations, and I can say it to you, admitting that I can't do as much as I would like to or have done in the past, so finding other ways of getting out in the garden, that's an example. Driving has become more of a concern particularly at night and when it's rainy. And again, that goes to some eyesight changes as we age. That's a very good question because when I look, I think the hardest thing is admitting that you're getting older, that I'm getting older” (P27)</p> <p>“Okay. I'm currently and always have, I never think of myself as old until say for the last four or five years. I've been down in the or kneeled down in the garden and then I have a heck of a time getting back up. That's the only time I think of myself as old, but my body is telling me that I'm getting older, but mentally I still think I'm whatever 40 or 50” (P41)</p> <p>"that's the only time I think of myself as being old other when I'm trying to get up from kneeling down in the garden or the lawn" (P41)</p> <p>“Have to be careful around draft horses because my balance isn't as good anymore either" (P16)</p> <p>"Take care of all of them in less than an hour before now I have to break up in three one hour sessions every day" (P16)</p> <p>“Mostly because of my stamina, my strength. I don't have the strength I used to. It's really hard to get anything open anymore. I carry scissors with me everywhere I go. And that's just been frustrating because I was a mail carrier for 30 years and I had to be strong. And since I've retired, I've really lost a lot of strength. And pulling myself up, that kind of thing. So I have to take all that into mind when I am going to do something physical” (P34)</p> <p>“That's kind of hard to say. I'm just thinking you get older and you get aches and pains and even the doctor, they say,</p> |
|--|--|--------------------------------------------------------------------------------------------------------------------------------------------------------------------------------------------------|---------------------------------------------------------------------------------------------------------------------------------------------------------------------------------------------------------------------------------------------------------------------------------------------------------------------------------------------------------------------------------------------------------------------------------------------------------------------------------------------------------------------------------------------------------------------------------------------------------------------------------------------------------------------------------------------------------------------------------------------------------------------------------------------------------------------------------------------------------------------------------------------------------------------------------------------------------------------------------------------------------------------------------------------------------------------------------------------------------------------------------------------------------------------------------------------------------------------------------------------------------------------------------------------------------------------------------------------------------------------------------------------------------------------------------------------------------------------------------------------------------------------------------------------------------------------------------------------------------------------------------------------------------------------------------------------------------------------------------------------------------------------------------------------------------------------------------------------------------------------------------------------------------------------------------------------------------------------------------------------------------------------------------------------------------------------------------------------------------------------------------------------------------------------------------------|

|  |                   |                                                                                                                                                                                                                                                                                                                                                                                                                                                                                                                                                                                                                                                                                                                                                                                                                                                                                                                                                                                                                                                                                                                                                                                                                                                                                                                                                                                                                                                                                                                                                                                                                                                                                                |
|--|-------------------|------------------------------------------------------------------------------------------------------------------------------------------------------------------------------------------------------------------------------------------------------------------------------------------------------------------------------------------------------------------------------------------------------------------------------------------------------------------------------------------------------------------------------------------------------------------------------------------------------------------------------------------------------------------------------------------------------------------------------------------------------------------------------------------------------------------------------------------------------------------------------------------------------------------------------------------------------------------------------------------------------------------------------------------------------------------------------------------------------------------------------------------------------------------------------------------------------------------------------------------------------------------------------------------------------------------------------------------------------------------------------------------------------------------------------------------------------------------------------------------------------------------------------------------------------------------------------------------------------------------------------------------------------------------------------------------------|
|  |                   | <p>"Yeah, you're getting older." It's not like oh, yeah, this will go away with a little PT, you know? Your body is starting to wear out, and that's just... It happens to everybody at some point, but I think it's hard." (P189)</p> <p>"I don't like admitting it, but yeah. There were things that I did five or 10 years ago that I might think about doing now, but it's not going to happen. Like we used to do the Great Bicycle Ride Across Iowa, which is a one week, 450 or 500 mile bike ride, and I would love to do it again, but no, probably not. It's more desire rather than like oh, could I really do all that training again, and could I do it without my knee going out?" (P189)</p> <p>"Getting older you make adjustments to your lifestyle" (P189)</p>                                                                                                                                                                                                                                                                                                                                                                                                                                                                                                                                                                                                                                                                                                                                                                                                                                                                                                               |
|  | <b>Care Needs</b> | <p>Codes refer to participants' self-described needs to remain active, healthy, independent, while accepting their situation: "I go out walking three miles after I get off of work," "my life focus now is eating healthier," and "you have to be able to do stairs if you're going to see anything."</p> <p>"I'm 68, my wife is 67, and we both have a lot of interests and are fortunate to have pretty wide social circles and live in a neighborhood that's very social too, so we have a nice wide range of stimulation." (P18)</p> <p>"I worked eight hours every day. I go out walking three miles after I get off of work. I mean, I feel great" (P24)</p> <p>"I realize now eating healthier is big on my list and cutting carbs and watching sugar intake. Just, I feel better when I'm not eating those types of things. So my life focus now is eating healthier." (P24)</p> <p>"And I feel now sometimes pain in my knees. I never feel eight or 10 years ago previously, but that's one of the, that's one of the reasons that I take more seriously, the exercise be in and another thing is that I know those exercise because I'm starting feeling some pain in my knees. I know I have to stretch very well after exercise. That was something that I didn't do in the past." (P40)</p> <p>"But now I actually enjoy the stretching part of the exercise and that is because I am realizing well, I'm not in my twenties, I'm now 50 years old. I'm not too old, but I'm going to, I'm going to get older, like everybody else." (P40)</p> <p>"Probably the least helpful thing that we have is our house. We moved out here about 10 years ago. We specifically bought</p> |

|                 |                                           |                                                                                                                                                                             |                                                                                                                                                                                                                                                                                                                                                                                                                                                                                                                                                                                                                                                                                                                                                                                                                                                                                                                                                                                                                                                                                                                                                                                                                                                                                                 |
|-----------------|-------------------------------------------|-----------------------------------------------------------------------------------------------------------------------------------------------------------------------------|-------------------------------------------------------------------------------------------------------------------------------------------------------------------------------------------------------------------------------------------------------------------------------------------------------------------------------------------------------------------------------------------------------------------------------------------------------------------------------------------------------------------------------------------------------------------------------------------------------------------------------------------------------------------------------------------------------------------------------------------------------------------------------------------------------------------------------------------------------------------------------------------------------------------------------------------------------------------------------------------------------------------------------------------------------------------------------------------------------------------------------------------------------------------------------------------------------------------------------------------------------------------------------------------------|
|                 |                                           |                                                                                                                                                                             | <p>a house with stairs so that we would be forced to get some exercise and keep fairly fit. The stairs have been somewhat of a hindrance in my wife's recovery. On the other hand, once she got to the point where she could do them, then it became a regular activity to build up her stamina. We like going to places where we can see things, the old houses, or things like the Biltmore or Williamsburg. You have to be able to do stairs if you're going to see anything. We want to be in that condition. But the house has made life a little more difficult, not impossible" (P11)</p> <p>"The only reason I'm walking slow, like an aged person is from my accident. But, I don't feel like I'm aging but I see that I'm aging. My hair is just now starting to get gray and I'll be 60 in August" (P71)</p> <p>"You know, I just don't think it's fair that my children would have to take care of me. It's not their place. I just don't want them to do it. My daughter is an RN, and she has said to me, "Mom, you'll never go to a nursing home or a long-term care facility. I will take care of you." And after putting up with my husband, I would never do that to her. No. I mean, it's all kind gestures, but it's easier said than done once you've lived it" (P150)</p> |
| <b>Finances</b> | <b><i>Lack of financial resources</i></b> | <p>Codes refer an absence of monetary means and assets that can be drawn upon: "it has wiped me out financially" and "I don't have the money to put back for planning."</p> | <p>"The money, number one. I did not plan properly I guess. I have the burden, although it's my choice... These animals are not cheap to keep up with and it all comes out of my money, my retirement money." (P16)</p> <p>"Because of the way the finances are engineered in this country, and my husband's extensive healthcare needs in the last seven or eight years, it has wiped me out financially. I'm maxed out. I'm living on social security and that's difficult, but it's not unique to me." (P36)</p> <p>"When my first marriage ended in divorce because he left, I've always been affected financially by that" (P71)</p> <p>"Affected my finances to where we had two house payments and we just didn't let go of that home and I provided it to my children" (P71)</p> <p>"I guess, because I have always had a tight budget and I felt as though I don't</p>                                                                                                                                                                                                                                                                                                                                                                                                                 |

|                      |                          |                                                                                                                                                                                                                                                                                                                                                                |                                                                                                                                                                                                                                                                                                                                                                                                                                                                                                                                                                                                                                                                                                                                                                                                                                                                                                                                                                                                                                                                                                                                                                                                                                                                                                                                                                                            |
|----------------------|--------------------------|----------------------------------------------------------------------------------------------------------------------------------------------------------------------------------------------------------------------------------------------------------------------------------------------------------------------------------------------------------------|--------------------------------------------------------------------------------------------------------------------------------------------------------------------------------------------------------------------------------------------------------------------------------------------------------------------------------------------------------------------------------------------------------------------------------------------------------------------------------------------------------------------------------------------------------------------------------------------------------------------------------------------------------------------------------------------------------------------------------------------------------------------------------------------------------------------------------------------------------------------------------------------------------------------------------------------------------------------------------------------------------------------------------------------------------------------------------------------------------------------------------------------------------------------------------------------------------------------------------------------------------------------------------------------------------------------------------------------------------------------------------------------|
|                      |                          |                                                                                                                                                                                                                                                                                                                                                                | <p>have the money to put back for planning and I work for the state so I felt, "I'm going to have a nice retirement with my retirement plan and I don't really need to, because I have a retirement plan." (P71)</p> <p>"Plus, I didn't feel like I had the money to put back. It's all about not feeling like I have the money to put back and thinking my retirement plan, that's the big thing, thinking, "Oh, I've got a retirement plan." So, you're thinking, "I'm fine." No, you're aging planning needs to be completely different from your retirement plan" (P71)</p> <p>"My financial situation and the denial of thinking that I didn't need it because I had a good retirement. You think if you've got a good retirement, you don't need to plan for aging. After all, I'm never going to get old, right?" (P71)</p>                                                                                                                                                                                                                                                                                                                                                                                                                                                                                                                                                         |
| <b>Service Needs</b> | <b><i>Healthcare</i></b> | <p>Codes refer to participants' specific healthcare needs based on negative experiences: "doesn't seem to be a fix other than staying out of the hospital," "uncertainty of the Medicare program and the rising cost of medications," and "wish we had a little more effort, in making sure that everyone who might care for me knows about those things."</p> | <p>"Nothing has been helpful. I have to work to not become discouraged, which it's hard not to because there doesn't seem to be a fix other than staying out of the hospital and away from the doctors. Which sort of isn't tenable, unless you just want to crawl into your bed and die, which is not the preferred solution either. But the mere thought of going and dealing with their bureaucracy, their computer systems that the snippy, nasty, rude, not just an expert, not just an expert, but arrogant and condescending attitude that isn't even on track with whatever the symptoms are. The absolute inability to listen to what the ill person or the person who is trying to care for them and with them 24 hours a day. The nastiness." (P1)</p> <p>"What's not helpful, and this is from more of a macro-perspective, is the uncertainty of the Medicare program and the rising cost of medications and just the whole national debate on healthcare. And for me, it needs to be a greater discussion of the healthcare service needs of seniors. So it's the confusing information that's out there driven by a whole host of factors, political considerations, economic considerations, and trying to sort through all of that so that I could make an informed decision." (P27)</p> <p>"Well, I would think maybe all the various options under Medicare and the</p> |

|  |                             |                                                                                                                                                                                                                                                                                             |                                                                                                                                                                                                                                                                                                                                                                                                                                                                                                                                                                                                                                                                                                                                                                                                                                                                                                                                                                                                                                                                                                                                                                                                                                                                                                                                                        |
|--|-----------------------------|---------------------------------------------------------------------------------------------------------------------------------------------------------------------------------------------------------------------------------------------------------------------------------------------|--------------------------------------------------------------------------------------------------------------------------------------------------------------------------------------------------------------------------------------------------------------------------------------------------------------------------------------------------------------------------------------------------------------------------------------------------------------------------------------------------------------------------------------------------------------------------------------------------------------------------------------------------------------------------------------------------------------------------------------------------------------------------------------------------------------------------------------------------------------------------------------------------------------------------------------------------------------------------------------------------------------------------------------------------------------------------------------------------------------------------------------------------------------------------------------------------------------------------------------------------------------------------------------------------------------------------------------------------------|
|  |                             |                                                                                                                                                                                                                                                                                             | <p>private Medicare Advantage plans and the insurance representatives who all get your phone number when you turn 65 and call, 15 calls a day. I think that is... It's overwhelming and so somewhat I think misleading, so I think that has been hard to ferret out, what is the best option, and just to get inundated with all that material when you are about six months from your 65th birthday, that's sort of not helpful." (P21)</p> <p>"I've requested to put that on my medical record so that if I go in an emergency somewhere and I don't seem to be responding appropriately that they don't assume that I have dementia" (P21)</p> <p>"I wish we had a little more effort, I guess, in making sure that everyone who might care for me knows about those things" (P21)</p>                                                                                                                                                                                                                                                                                                                                                                                                                                                                                                                                                              |
|  | <b><i>Broken System</i></b> | <p>Codes refer to participants' thoughts on the fractured and damaged network of resources available:</p> <p>"I think people forget about the elderly,"</p> <p>"we're not interconnecting properly," and "great difficulty in accessing resources that are available in the community."</p> | <p>"I think there should be more outreaches out there to help the elderly. Especially, I think people forget about the elderly. A lot of people can't afford certain things, and I think certain services should be set up for the elderly. And I also think that there should be money where we can help certain elderly people, because everybody didn't retire and get two checks. And when I say that, like your social security checks and your retirement check. And everybody wasn't in a 401K. Some people are living on \$400 and \$500. And then they got all these medical bills and trying to buy their medicine and everything else and eat. And I think that that causes a lot of stress where they have to decide what they're going to do." (P131)</p> <p>"Are they going to eat today or going to pay this or going to get their medicine" (P131)</p> <p>"I think I'm very disappointed in the services that are offered and assistance that is offered to the elderly." (P131)</p> <p>"We're not interconnecting properly, as I said, with businesses that could be taking some of the burden off. We're not interconnected in our disciplines. There's no time for effective communication." (P36)</p> <p>"I think a lot of people don't... Maybe would not have the resources, would not know where to turn, would not know to</p> |

|  |  |  |                                                                                                                                                                                                                                                                                                            |
|--|--|--|------------------------------------------------------------------------------------------------------------------------------------------------------------------------------------------------------------------------------------------------------------------------------------------------------------|
|  |  |  | whom they would ask for help, would not be able to... Maybe would have great difficulty in accessing resources that are available in the community that... You know, they may not have any idea. They may not be able to act upon those resources because they just don't know how to look for them” (P18) |
|--|--|--|------------------------------------------------------------------------------------------------------------------------------------------------------------------------------------------------------------------------------------------------------------------------------------------------------------|

## Supplementary S4. Coding Process

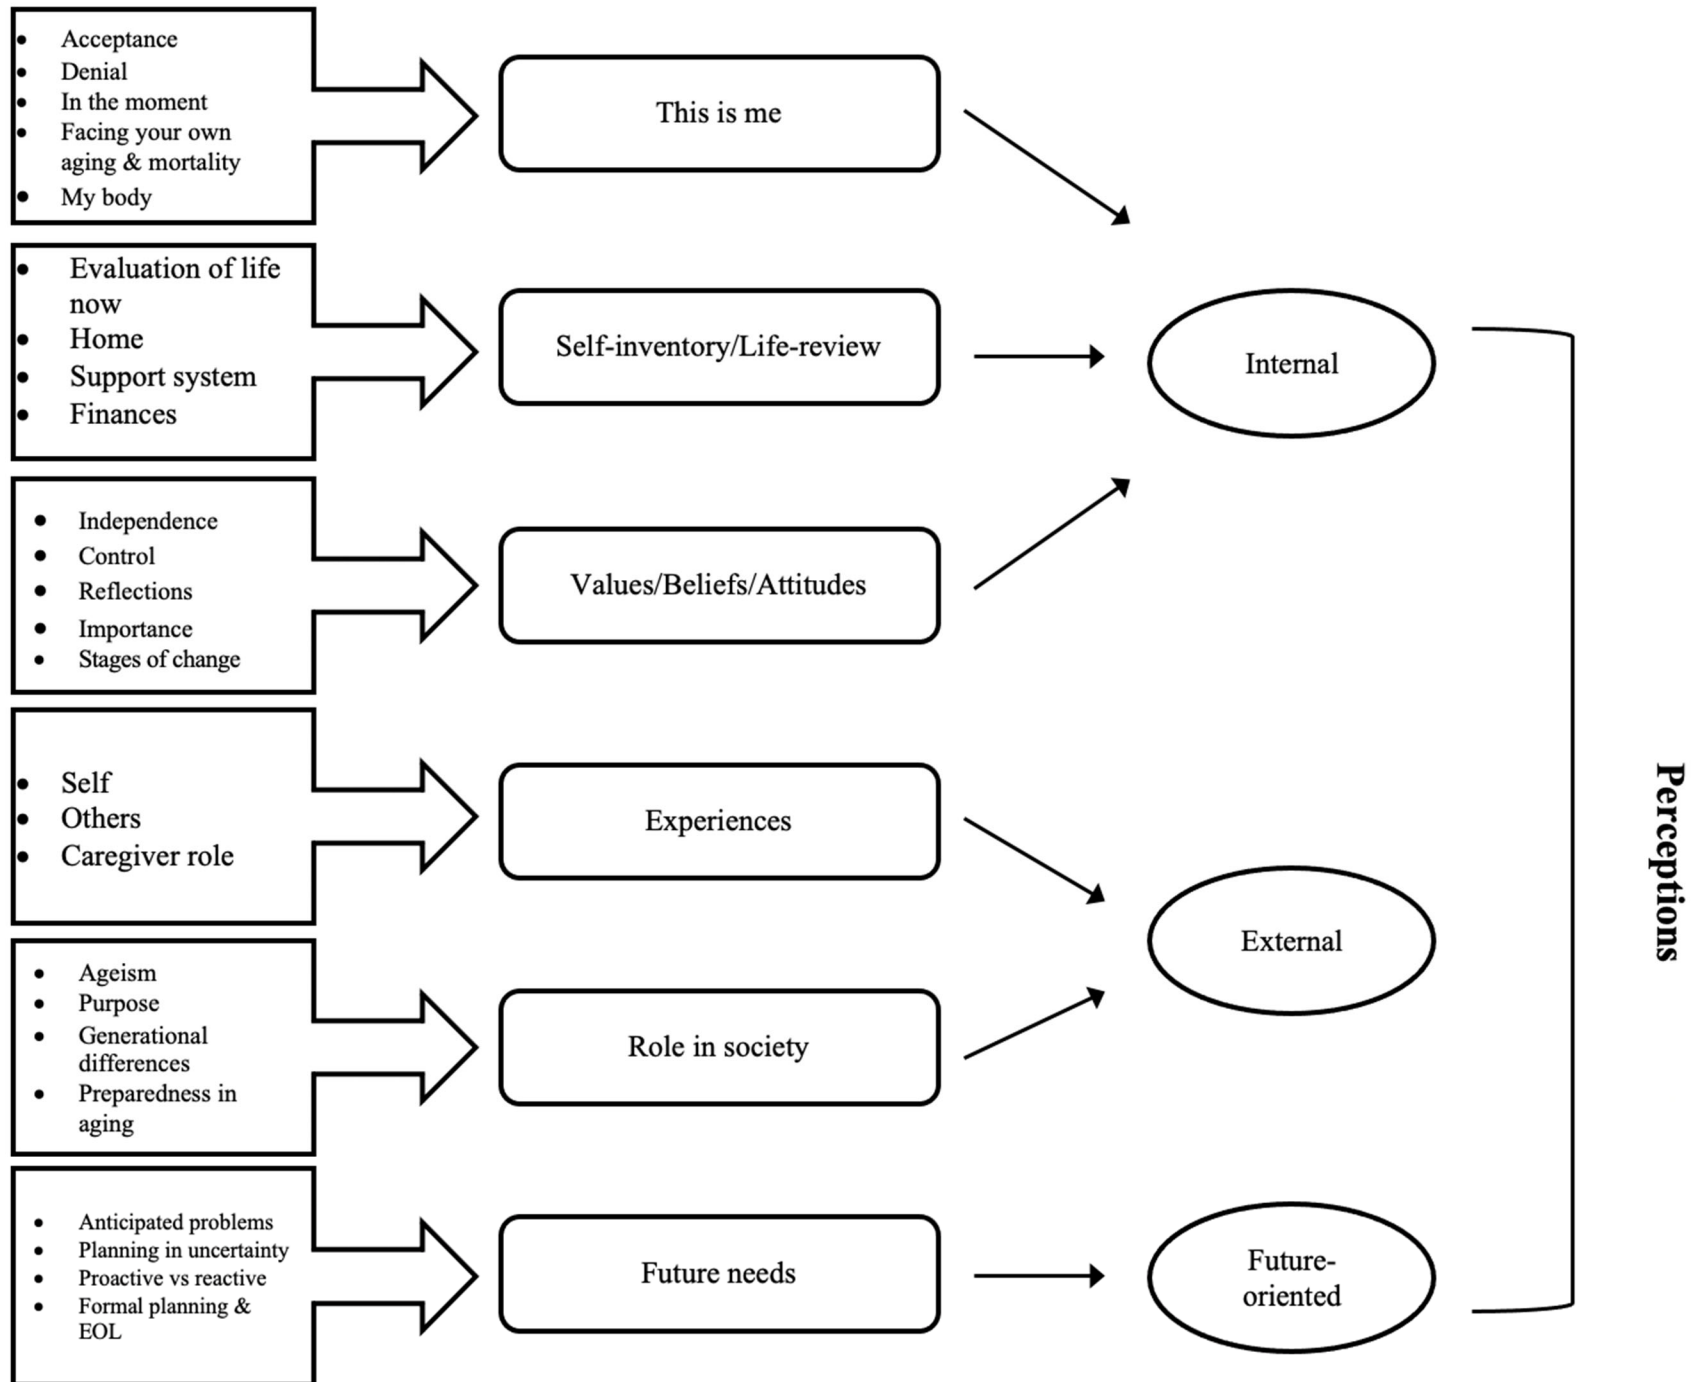

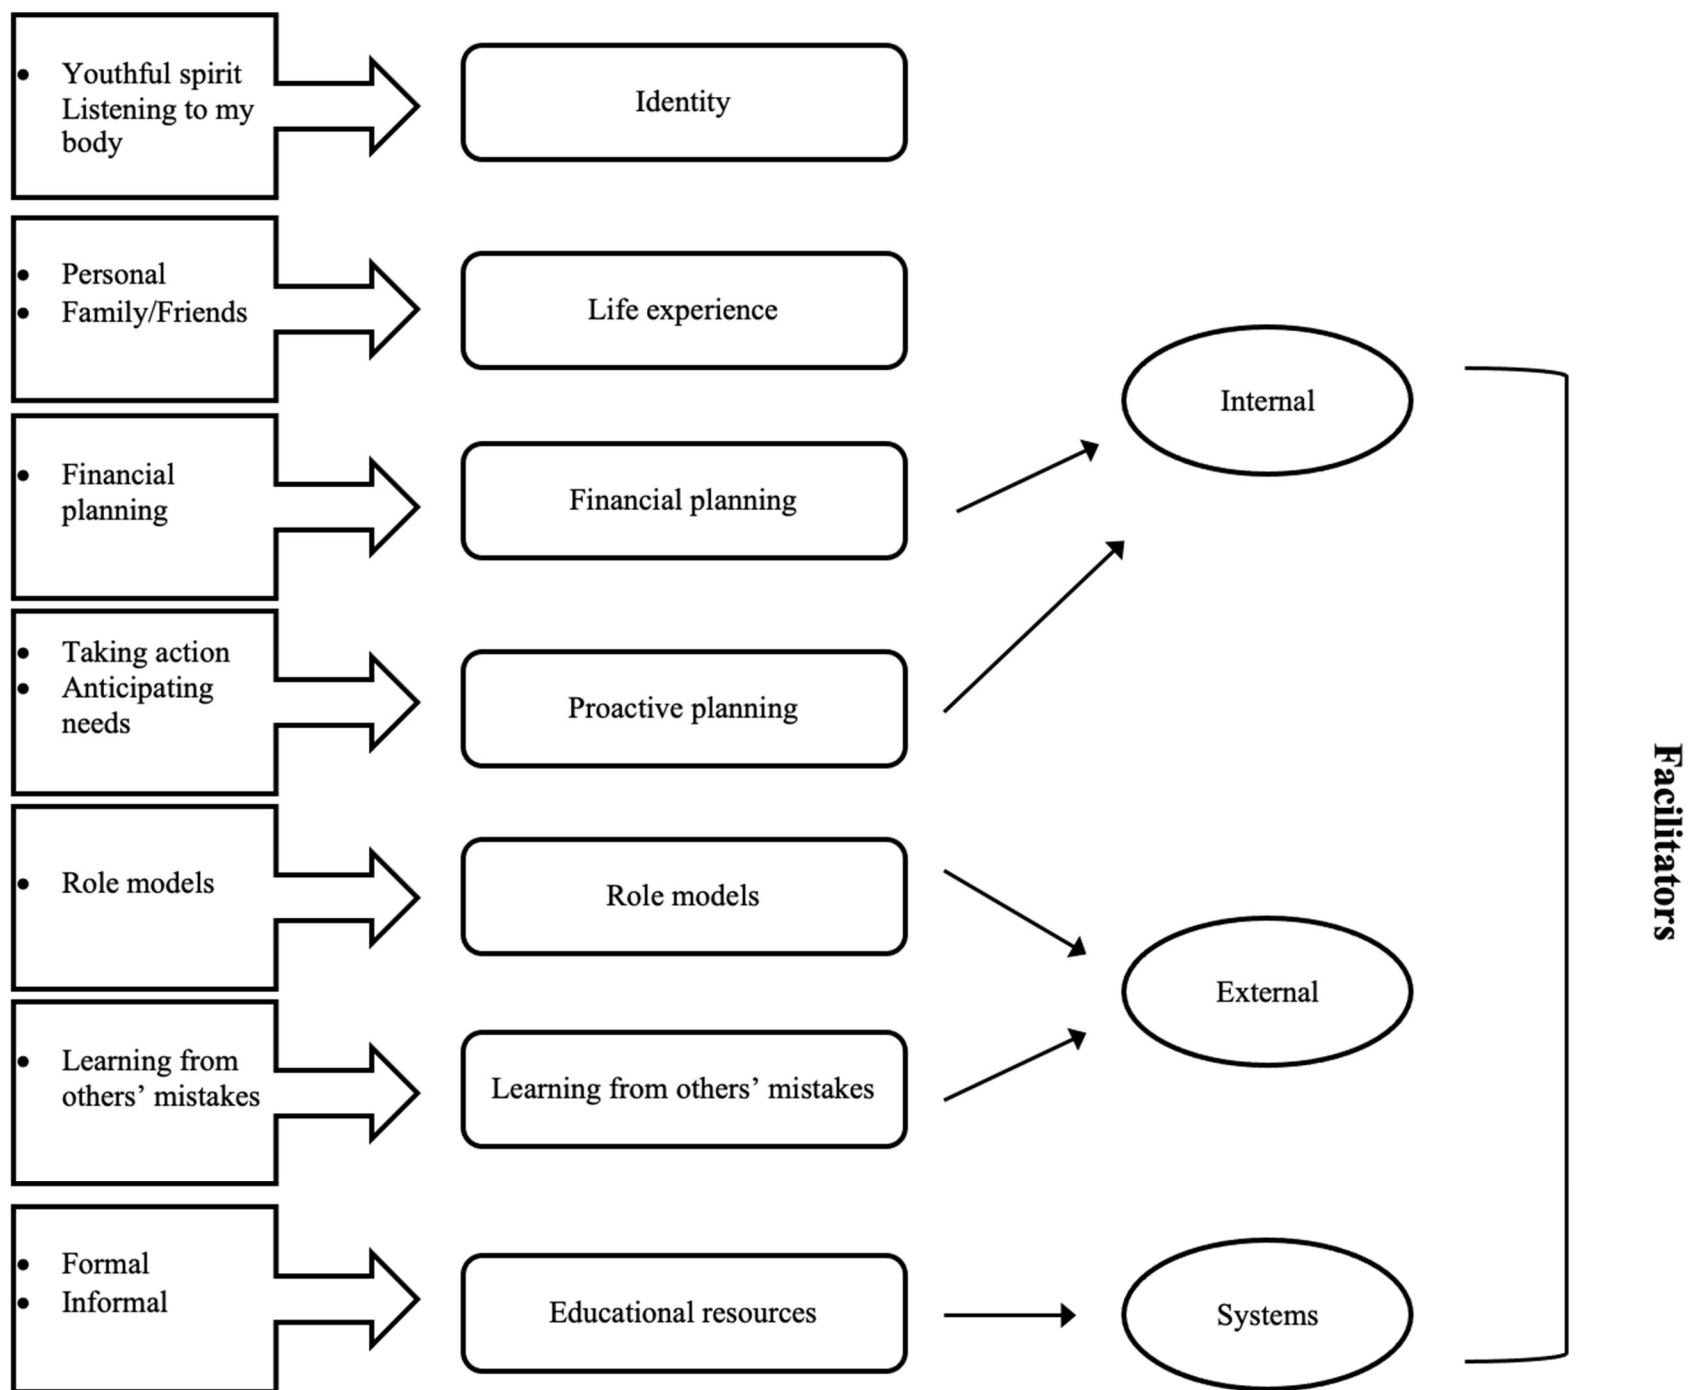

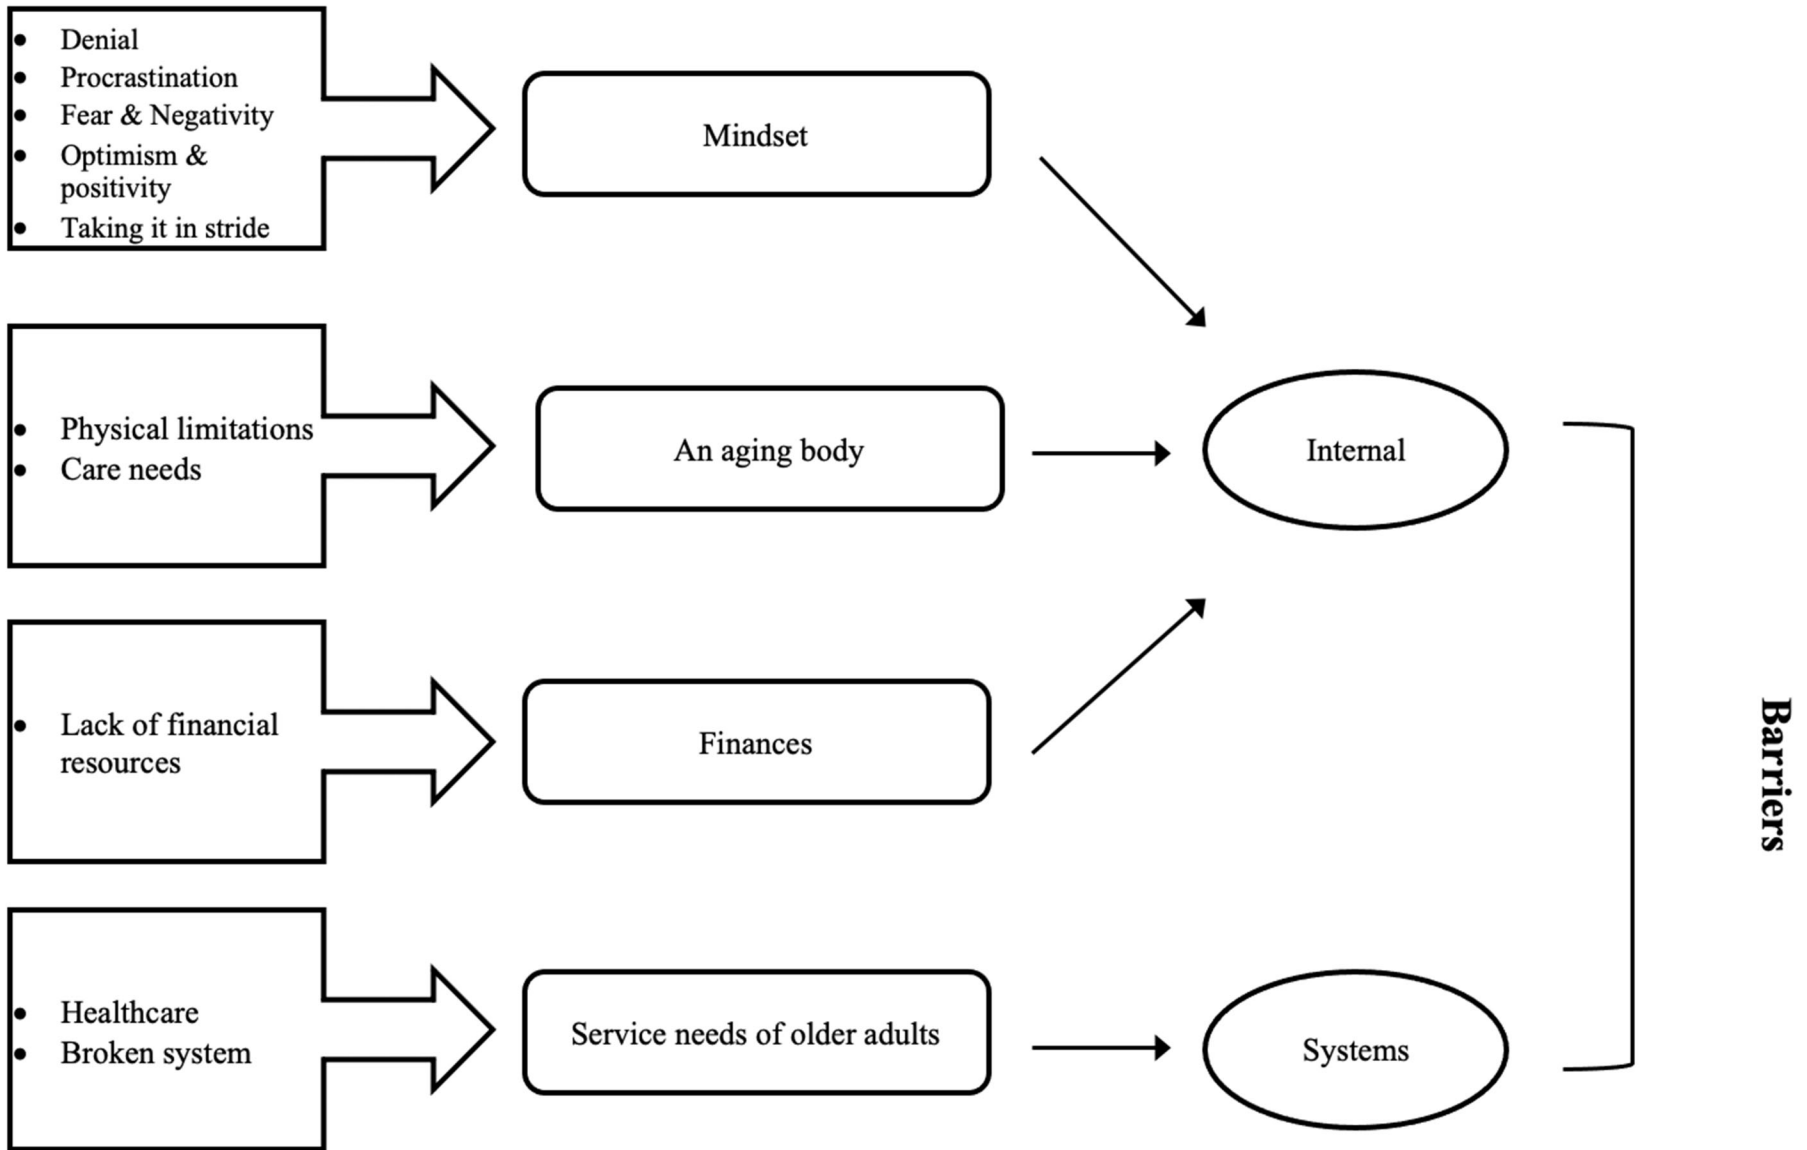

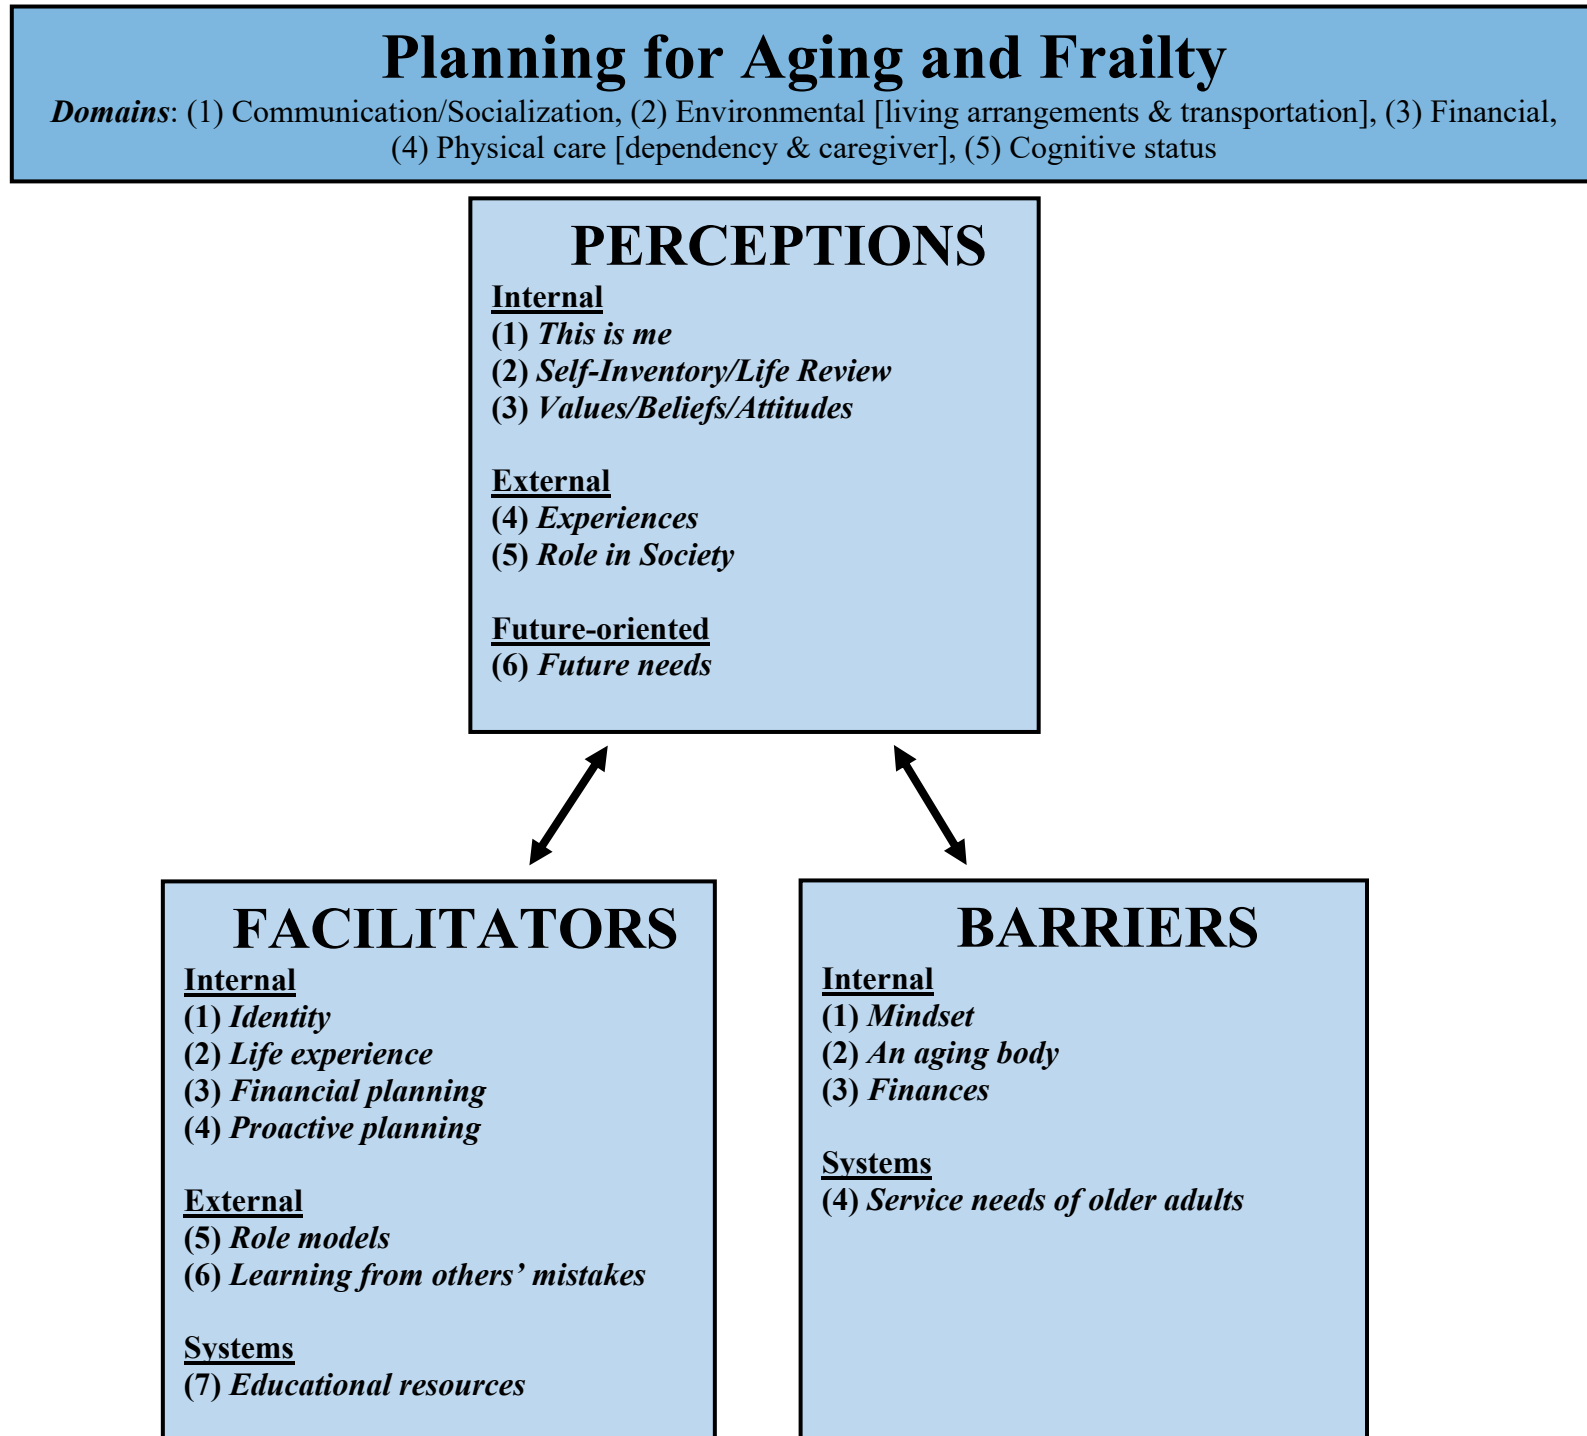

Supplement: s1 [file s1 › jal-2121204-supplementary.pdf]
